# Supplementary material for: Global aviation contrail climate effects from 2019 to 2021
Source: Copernicus journal article supplement (doi:10.5194/acp-24-6071-2024), 2024-05-27
Supplement: Supplementary file 1 [file acp-24-6071-2024-supplement.pdf]

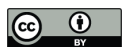

*Supplement of*

## **Global aviation contrail climate effects from 2019 to 2021**

**Roger Teoh et al.**

*Correspondence to:* Marc E. J. Stettler (m.stettler@imperial.ac.uk)

The copyright of individual parts of the supplement might differ from the article licence.

1 **Table of Contents**

2 S1 Meteorology ..... 2

3 S1.1 ERA5 high-resolution realization ..... 2

4 S1.2 Existing corrections to ERA5 humidity fields ..... 4

5 S1.3 Global humidity correction ..... 5

6 S2 CoCiP model outputs ..... 14

7 S3 Global contrail simulation..... 17

8 S4 Sensitivity analysis..... 27

9 S4.1 Extended humidity correction..... 31

10 S4.2 Radiative heating effects ..... 32

11 S4.3 Contrail-contrail overlapping ..... 33

12 S5 Comparison with other studies..... 37

13 References..... 39

14

15

## 16 S1 Meteorology

### 17 S1.1 ERA5 high-resolution realization

18 In this study, we use meteorological and radiation data from the European Centre for Medium-  
19 Range Weather Forecast (ECMWF) Reanalysis 5<sup>th</sup> Generation (ERA5) high-resolution  
20 realization (HRES) to perform the global contrail simulation (Hersbach et al., 2020). The ERA5  
21 HRES is publicly available from the ECMWF Copernicus Climate Data Store (ECMWF, 2021)  
22 and the following variables were downloaded at a spatiotemporal resolution of  $0.25^\circ \times 0.25^\circ$   
23 over 37 pressure levels for meteorological variables (or 1 level for radiation variables) and at a  
24 1 h temporal resolution:

- 25 • specific humidity (in  $\text{kg kg}^{-1}$ ),
- 26 • air temperature (in K),
- 27 • eastward and northward wind (in  $\text{m s}^{-1}$ ),
- 28 • lagrangian tendency of air pressure, i.e., vertical velocity (in  $\text{Pa s}^{-1}$ ),
- 29 • specific cloud ice water content (in  $\text{kg kg}^{-1}$ ),
- 30 • fraction of cloud cover,
- 31 • geopotential (in  $\text{m}^2 \text{s}^{-2}$ ),
- 32 • top of atmosphere incident solar radiation (in  $\text{J m}^{-2}$ ),
- 33 • top of atmosphere net upward shortwave flux (in  $\text{J m}^{-2}$ ), and
- 34 • top of atmosphere outgoing longwave flux (in  $\text{J m}^{-2}$ ).

35 Meteorology at each waypoint is obtained using a quadrilinear interpolation across space  
36 (longitude, latitude, and pressure level) and time. We calculate the relative humidity with  
37 respect to liquid water (RH) and relative humidity with respect to ice (RH<sub>i</sub>) using the following  
38 equations from Sonntag (1994),

$$RH = \frac{p_w q_w R_1}{p_{liq} R_0}, \quad (S1)$$

$$RH_i = \frac{p_w q_w R_1}{p_{ice} R_0}. \quad (S2)$$

39 where  $p_w$  is the pressure altitude for each waypoint (in Pa),  $q_w$  is the specific humidity,  $R_0$   
 40 ( $287.05 \text{ J kg}^{-1} \text{ K}^{-1}$ ) and  $R_1$  ( $461.51 \text{ J kg}^{-1} \text{ K}^{-1}$ ) are the real gas constant for air and water vapour  
 41 respectively, and the saturation pressure of water vapour over liquid water ( $p_{liq}$ , in Pa) and ice  
 42 ( $p_{ice}$ , in Pa) are calculated based on air temperature ( $T_w$ ) (Sonntag, 1994),

$$p_{liq} = 100 \exp \left[ \frac{-6096.9385}{T_w} + 16.635794 - 0.02711193 T_w + (1.673952 \times 10^{-5}) T_w^2 + 2.433502 \ln(T_w) \right], \quad (S3)$$

$$p_{ice} = 100 \exp \left[ \frac{-6024.5282}{T_w} + 24.721994 + 0.010613868 T_w - (1.3198825 \times 10^{-5}) T_w^2 - 0.49382577 \ln(T_w) \right]. \quad (S4)$$

43 The simulated contrail properties and lifetime have been shown to be highly sensitive to the  
 44 RH<sub>i</sub> (Schumann et al., 2021; Teoh et al., 2022). However, existing studies have identified  
 45 several limitations in the humidity fields provided by ECMWF ERA5 products. An assessment  
 46 of the ERA5 humidity fields showed that the ERA5-derived ice supersaturated regions (ISSR)  
 47 coverage area could be overestimated by up to 100% when compared with radiosonde  
 48 measurements (Agarwal et al., 2022), or underestimated relative to in-situ humidity  
 49 measurements from the In-Service Aircraft for a Global Observing System (IAGOS) campaign  
 50 (Reutter et al., 2020). In addition, the magnitude of RH<sub>i</sub> within the ERA5-derived ISSR are  
 51 generally weakly supersaturated (RH<sub>i</sub>  $\approx$  100%) and do not generally exceed RH<sub>i</sub> > 120%  
 52 (Reutter et al., 2020; Gierens et al., 2020; Teoh et al., 2022). The low variability in RH<sub>i</sub>  
 53 magnitude is most likely caused by simplified assumptions adopted in the ERA5 products  
 54 where the relaxation time, i.e., time required for the excess supersaturated humidity to be  
 55 deposited into ambient particles and ice crystals and reach equilibrium (RH<sub>i</sub>  $\approx$  100%), is  
 56 currently set to one model time step (Tompkins et al., 2007; Koop et al., 2000). In addition, the  
 57 spatiotemporal resolution of existing meteorological datasets is not sufficient to capture the  
 58 sub-grid scale variability and localised air pockets with RH<sub>i</sub> > 120%. Therefore, the use of

59 ERA5 products for contrail simulation can lead to errors and uncertainties in the simulated  
60 contrail lifetime, properties, and climate forcing (Teoh et al., 2022; Agarwal et al., 2022;  
61 Gierens et al., 2020).

## 62 **S1.2 Existing corrections to ERA5 humidity fields**

63 Studies that simulated contrails with the contrail cirrus prediction model (CoCiP) have  
64 formulated different approaches to account for the known limitations in the humidity fields  
65 provided by ECMWF products. Earlier studies used an enhancement factor ( $RHi_c$ ) to uniformly  
66 increase the  $RHi$  (Schumann, 2012; Schumann et al., 2015; Teoh et al., 2020; Schumann et al.,  
67 2021),

$$RHi_{Corrected} = \frac{RHi}{RHi_c}, \quad (S5)$$

68 where the  $RHi_c$  was set to 0.90 or 0.95 depending on the ECMWF product used  
69 (reanalysis/forecast), its spatiotemporal resolution, and/or the spatial domain of the simulation.  
70 While the rationale of Eq. (S5) was to increase the mean  $RHi$  so that the corrected humidity  
71 fields are no longer weakly supersaturated, there are inherent limitations where: (i) the  
72 correction could overestimate the ISSR coverage area, and subsequent estimates of the  
73 simulated contrail formation, lifetime and climate forcing (Agarwal et al., 2022); and (ii) it  
74 does not produce an  $RHi$  distribution that is consistent with in-situ measurements from the  
75 IAGOS campaign (Teoh et al., 2022).

76 To address these issues, Teoh et al. (2022) used in-situ humidity measurements from the  
77 IAGOS campaign (Petzold et al., 2020; Boulanger et al., 2022) to develop a new humidity  
78 correction methodology for the North Atlantic region,

$$\text{RHi}_{\text{corrected}} = \begin{cases} \frac{\text{RHi}}{a_{\text{opt}}} & , \text{ when } \left( \frac{\text{RHi}}{a_{\text{opt}}} \right) \leq 1 \\ \min \left( \left( \frac{\text{RHi}}{a_{\text{opt}}} \right)^{b_{\text{opt}}}, \text{RHi}_{\text{max}} \right) & , \text{ when } \left( \frac{\text{RHi}}{a_{\text{opt}}} \right) > 1 \end{cases} \quad (\text{S6})$$

79 where  $\text{RHi}_{\text{max}} = 1.65$ ,  $a_{\text{opt}} = 0.9779$  and  $b_{\text{opt}} = 1.635$  are calibrated coefficients to minimise the  
80 Cramer-von Mises (CvM) test statistic, a measure of the goodness of fit between two  
81 probability density functions (Parr and Schucany, 1980). This correction methodology  
82 addresses the two limitations from the earlier approach, i.e. Eq. (S5), where: (i) the false  
83 positive ( $N_{\text{IAGOS}}/Y_{\text{HRES}}$ , i.e., the ERA5 HRES derived RHi indicates that the waypoint is in  
84 ISSR but not in the IAGOS measurements) and false negative ( $Y_{\text{IAGOS}}/N_{\text{HRES}}$ ) rates are  
85 generally symmetrical which should lead to the cancelling out of errors in ISSR and contrail  
86 occurrence over the spatiotemporal domain; and (ii) the distribution of  $\text{RHi}_{\text{corrected}}$  is now  
87 consistent with in-situ RHi measurements from IAGOS (refer to Fig. S9 in Teoh et al. (2022)).  
88 Using Eq. (S6), the 2019 annual mean contrail cirrus net radiative forcing (RF) over the North  
89 Atlantic increased from  $121 \text{ mW m}^{-2}$  (no humidity correction) to  $235 \text{ mW m}^{-2}$ , indicating that  
90 the simulated contrail climate forcing is highly sensitive to the provided humidity fields (Teoh  
91 et al., 2022). However, we also note that the correction was formulated using RHi  
92 measurements in the North Atlantic and therefore, the calibrated coefficients ( $a_{\text{opt}}$  and  $b_{\text{opt}}$ )  
93 might not be valid when applied across the globe.

### 94 **S1.3 Global humidity correction**

95 Here, we use the full (global) IAGOS dataset (Petzold et al., 2020; Boulanger et al., 2022) to  
96 extend the humidity correction methodology from Teoh et al. (2022) so it can be applied to the  
97 global contrail simulation. The IAGOS dataset provides the aircraft position (longitude,  
98 latitude, pressure level and time) and measurements of  $q_w$  and  $T_w$  at a  $\sim 4 \text{ s}$  time interval from  
99 2,161 distinct flights in 2019. For each flight, we excluded waypoints that are below 25,000  
100 feet and resampled the time series data to obtain the mean  $q_w$  and  $T_w$  at a frequency of 60 s to

101 minimise the autocorrelation between data points (Gierens et al., 2020), and the resampled  
 102 dataset consists of 682,308 unique waypoints. Fig. S1 and S2 shows the spatial distribution of  
 103 the waypoints where  $q_w$  and  $T_w$  were measured: ~95% of the data points were measured in the  
 104 Northern Hemisphere, of which ~63% of them were between 20–50°N, and ~69% of the  
 105 measurements were at altitudes between 35,000 and 40,000 feet.

106 **Table S1: Comparison of the ISSR occurrence between the in-situ RH<sub>i</sub> measurements from the IAGOS**  
 107 **campaign in 2019 versus the RH<sub>i</sub> derived from the ERA5 HRES: (a) without humidity correction; and (b)**  
 108 **with the global humidity correction, c.f. Eq. (S6) to Eq. (S9). The comparison is segmented into latitude**  
 109 **intervals of 10°.  $Y_{IAGOS}$  indicates that the waypoint has an RH<sub>i</sub> > 100% (ISSR occurrence) according to the**  
 110 **in-situ measurements, while  $N_{IAGOS}$  indicates the opposite. The subscript “HRES” is used to indicate ISSR**  
 111 **occurrence as provided by the ERA5 HRES. For (b), the metrics that are highlighted in green (red)**  
 112 **indicates that its performance has improved (degraded) relative to (a).**

|                                                               | No. of waypoints | $Y_{IAGOS}/Y_{HRES}$ (%) | $N_{IAGOS}/N_{HRES}$ (%) | $Y_{IAGOS}/N_{HRES}$ (%) | $N_{IAGOS}/Y_{HRES}$ (%) | Ratio <sup>a</sup> | CvM <sub>stat</sub> <sup>b</sup> | ETS <sup>c</sup> |
|---------------------------------------------------------------|------------------|--------------------------|--------------------------|--------------------------|--------------------------|--------------------|----------------------------------|------------------|
| <b>(a) IAGOS vs. ERA5 HRES (No RH<sub>i</sub> correction)</b> |                  |                          |                          |                          |                          |                    |                                  |                  |
| 0 - 10°N                                                      | 20650            | 9.16                     | 70.1                     | 8.22                     | 12.5                     | -0.341             | 58.2                             | 0.207            |
| 10 - 20°N                                                     | 48366            | 5.02                     | 83.2                     | 5.67                     | 6.06                     | -0.064             | 73.0                             | 0.246            |
| 20 - 30°N                                                     | 144910           | 2.90                     | 90.1                     | 2.90                     | 4.08                     | -0.290             | 43.7                             | 0.264            |
| 30 - 40°N                                                     | 141131           | 4.42                     | 87.7                     | 3.69                     | 4.14                     | -0.110             | 93.1                             | 0.322            |
| 40 - 50°N                                                     | 114018           | 5.40                     | 85.1                     | 6.24                     | 3.31                     | 0.889              | 261                              | 0.315            |
| 50 - 60°N                                                     | 106993           | 6.75                     | 83.1                     | 6.39                     | 3.73                     | 0.714              | 232                              | 0.347            |
| 60 - 90°N                                                     | 33762            | 5.57                     | 87.0                     | 5.06                     | 2.33                     | 1.169              | 91.7                             | 0.390            |
| <b>(b) IAGOS vs. ERA5 HRES (Global humidity correction)</b>   |                  |                          |                          |                          |                          |                    |                                  |                  |
| 0 - 10°N                                                      | 20650            | 7.82                     | 71.8                     | 9.56                     | 10.9                     | -0.119             | 2.09                             | 0.183            |
| 10 - 20°N                                                     | 48366            | 4.44                     | 84.1                     | 6.25                     | 5.21                     | 0.199              | 2.55                             | 0.229            |
| 20 - 30°N                                                     | 144910           | 2.58                     | 90.7                     | 3.22                     | 3.50                     | -0.080             | 9.93                             | 0.249            |
| 30 - 40°N                                                     | 141131           | 4.28                     | 88.0                     | 3.83                     | 3.87                     | -0.010             | 24.2                             | 0.319            |
| 40 - 50°N                                                     | 114018           | 6.70                     | 83.7                     | 4.94                     | 4.69                     | 0.054              | 1.06                             | 0.358            |
| 50 - 60°N                                                     | 106993           | 8.40                     | 81.5                     | 4.74                     | 5.40                     | -0.122             | 22.3                             | 0.394            |
| 60 - 90°N                                                     | 33762            | 6.93                     | 86.1                     | 3.70                     | 3.28                     | 0.128              | 0.360                            | 0.456            |

113 <sup>a</sup>: Ratio compares the false positive and false negative rate and is computed by  $\frac{Y_{IAGOS}/N_{HRES}(\%)}{N_{IAGOS}/Y_{HRES}(\%)} - 1$ . A positive value indicates  
 114 that the ERA5 HRES underpredicts ISSR occurrence, a value of zero indicates a symmetrical false positive and false negative  
 115 rate, while a negative value indicates that the ERA5 HRES overpredicts ISSR occurrence.

116 <sup>b</sup>: CvM test statistic, where a lower value indicates a better goodness-of-fit between the probability density function of the  
 117 measured and ERA5-derived RH<sub>i</sub>.

118 <sup>c</sup>: The equitable threat score (ETS) is calculated according to Appendix A of Gierens et al. (2020), where ETS = 1 indicates  
 119 that the ERA5-derived RH<sub>i</sub> is in perfect agreement with measurements, ETS = 0 indicates a completely random relationship,  
 120 while ETS < 0 indicates an inverse relationship between the measured and ERA5-derived RH<sub>i</sub>.

121 The RH<sub>i</sub> for each waypoint is calculated using: (i) Eq. (S2) and (S4) with in-situ measurements  
 122 of  $q_w$  and  $T_w$ , hereby known as RH<sub>iIAGOS</sub>; and (ii) a quadrilinear interpolation from the ERA5  
 123 HRES humidity fields. To avoid statistical bias and oversampling at specific latitude bands, we  
 124 split the IAGOS dataset into latitude bins of 10° intervals. Table S1a compares RH<sub>iIAGOS</sub> with

125 the RHi derived from the original ERA5 HRES humidity fields for each latitude bin. An  
126 analysis of the false positive ( $N_{IAGOS}/Y_{HRES}$ ) and false negative ( $Y_{IAGOS}/N_{HRES}$ ) rates shows that  
127 the RHi errors have a latitude dependence, where the ERA5-derived ISSR coverage area could  
128 be: (i) overpredicted at the tropics and subtropics ( $0-40^{\circ}N$ ); and (ii) underpredicted at higher  
129 latitudes above  $40^{\circ}N$ .

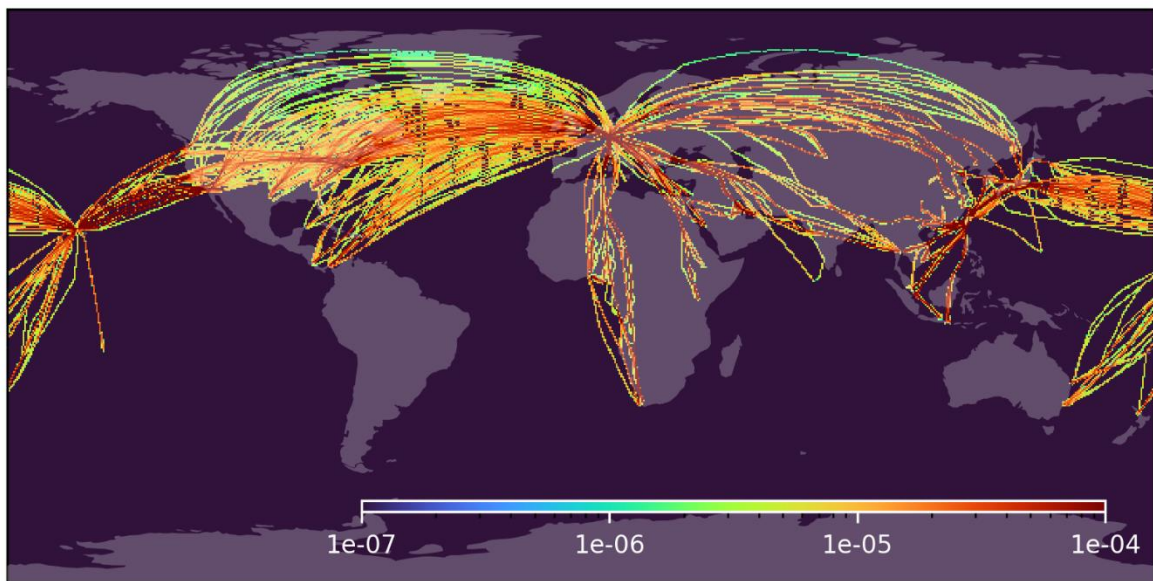

130  
131 **Figure S1: Spatial distribution of the data points provided by the resampled IAGOS dataset, where the**  
132 **colour bar represents the normalised density at each pixel (682,308 waypoints from 2,161 unique flights).**  
133 **Basemap plotted using Cartopy 0.22.0 and sourced from Natural Earth; licensed under public domain.**

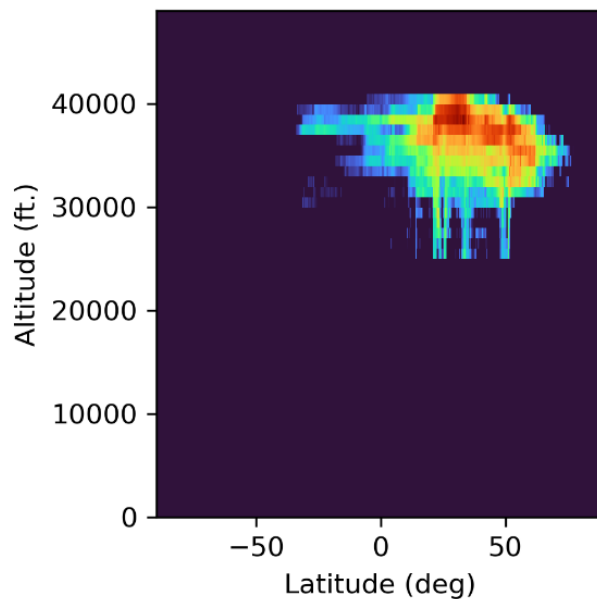

134  
135 **Figure S2: Distribution of the data points provided by the resampled IAGOS dataset by latitude and**  
136 **altitude (682,308 waypoints from 2,161 unique flights).**



137 **Table S2:  $a_{opt}$  and  $b_{opt}$  coefficients for each latitude band that is calibrated using the full IAGOS dataset**  
 138 **and a bootstrap resampling method ( $n=1000$ ) that provides an estimate of their respective standard errors.**

|           | $a_{opt}$    |                         | $b_{opt}$          |                        |
|-----------|--------------|-------------------------|--------------------|------------------------|
|           | Full dataset | Bootstrap <sup>a</sup>  | Full dataset       | Bootstrap <sup>a</sup> |
| 0 - 10°N  | 1.022        | 1.038 [1.019, 1.056]    | 2.900 <sup>b</sup> | 2.900 <sup>b</sup>     |
| 10 - 20°N | 1.003        | 1.023 [1.013, 1.034]    | 2.672              | 2.664 [2.539, 2.813]   |
| 20 - 30°N | 1.020        | 1.019 [1.013, 1.025]    | 1.516              | 1.519 [1.453, 1.586]   |
| 30 - 40°N | 1.007        | 1.011 [1.006, 1.019]    | 1.445              | 1.448 [1.398, 1.492]   |
| 40 - 50°N | 0.9563       | 0.9644 [0.9547, 0.9750] | 1.633              | 1.632 [1.594, 1.680]   |
| 50 - 60°N | 0.9641       | 0.9782 [0.9688, 0.9875] | 1.320              | 1.325 [1.289, 1.359]   |
| 60 - 90°N | 0.9406       | 0.9099 [0.8734, 0.9430] | 1.336              | 1.340 [1.266, 1.498]   |

139 <sup>a</sup>: The bootstrap resampling method is used to estimate the mean  $a_{opt}$  and  $b_{opt}$  for each latitude band and their respective standard  
 140 error [1<sup>st</sup> percentile, 99<sup>th</sup> percentile].

141 <sup>b</sup>: The  $b_{opt}$  for this latitude band is constrained to 2.9 to prevent the corrected RHi in having unrealistic values.

142 **Table S3: Comparison of different performance metrics to evaluate the agreement between the RHi**  
 143 **measurements from the full IAGOS dataset for 2019 versus the uncorrected and corrected ERA5 HRES**  
 144 **global humidity fields. These metrics are weighted by the number of waypoints in each latitude bin (see**  
 145 **Table S1).**

| Full IAGOS dataset vs. ERA5 HRES              | Correct prediction (%) | Ratio <sup>a</sup> | Mean CvM statistic <sup>b</sup> | Mean ETS <sup>c</sup> |
|-----------------------------------------------|------------------------|--------------------|---------------------------------|-----------------------|
| Uncorrected humidity fields                   | 90.9                   | 0.245              | 134                             | 0.305                 |
| Global humidity correction                    | 91.1                   | -0.014             | 12.4                            | 0.319                 |
| North Atlantic correction (Teoh et al., 2022) | 90.7                   | -0.104             | 45.0                            | 0.324                 |

146 <sup>a</sup>: Ratio compares the false positive and false negative rate and is computed by  $\left(\frac{Y_{IAGOS}/N_{HRES}(\%)}{N_{IAGOS}/Y_{HRES}(\%)} - 1\right)$ . A positive value indicates  
 147 that the ERA5 HRES underpredicts ISSR occurrence, a value of zero indicates a symmetrical false positive and false negative  
 148 rate, while a negative value indicates that the ERA5 HRES overpredicts ISSR occurrence.

149 <sup>b</sup>: CvM test statistic, where a lower value indicates a better goodness-of-fit between the probability density function of the  
 150 measured and ERA5-derived RHi.

151 <sup>c</sup>: The equitable threat score (ETS) is calculated according to Appendix A of Gierens et al. (2020), where ETS = 1 indicates  
 152 that the ERA5-derived RHi is in perfect agreement with measurements, ETS = 0 indicates a completely random relationship,  
 153 while ETS < 0 indicates an inverse relationship between the measured and ERA5-derived RHi.

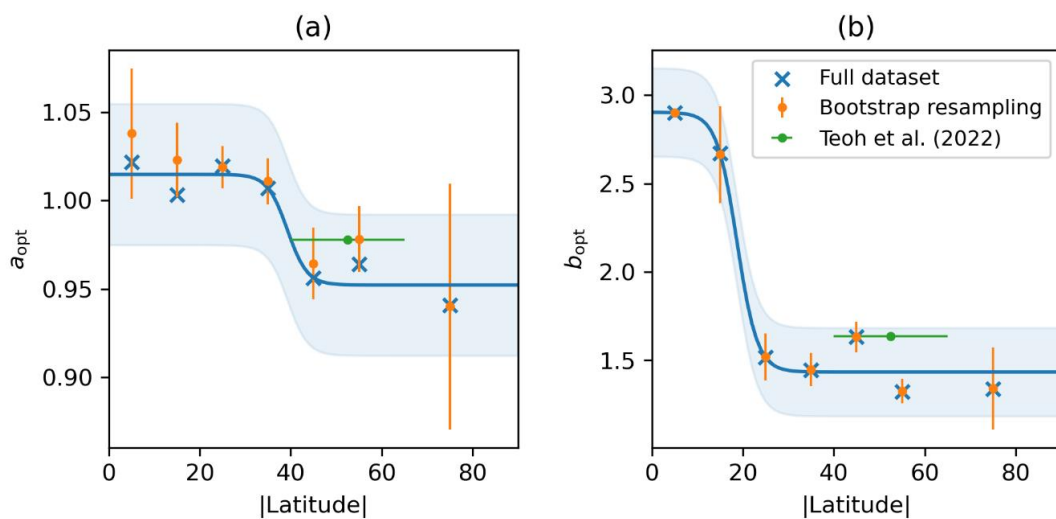

154 **Figure S3: Visualisation of Eq. (S7) and (S8), where a sigmoid is used to fit (a)  $a_{opt}$  and (b)  $b_{opt}$  as a function**  
 155 **of latitude. The vertical lines from the bootstrap resampling method (orange data points) represent the 1<sup>st</sup>**  
 156 **and 99<sup>th</sup> percentile of the standard error, and the shaded regions approximate the uncertainty of  $a_{opt}$  and**  
 157  **$b_{opt}$ . The  $a_{opt}$  and  $b_{opt}$  derived from an earlier study in the North Atlantic region (Teoh et al., 2022) is also**  
 158 **plotted as green data points.**

160 Based on these results, we use Eq. (S6) as a basis to extend the humidity correction  
 161 methodology from Teoh et al. (2022) and capture these latitude effects. The  $a_{\text{opt}}$  and  $b_{\text{opt}}$   
 162 coefficients are optimised for each latitude bin: the first step involves optimising  $a_{\text{opt}}$  with the  
 163 objective function of yielding a symmetrical false positive and false negative rate so that errors  
 164 in the ISSR occurrence cancel each other out; and  $b_{\text{opt}}$  is then optimised by minimising the  
 165 CvM test statistic (Parr and Schucany, 1980) so that the ERA5-derived RHi has a probability  
 166 density function that is consistent with  $\text{RHi}_{\text{IAGOS}}$ . Table S2 summarises the  $a_{\text{opt}}$  and  $b_{\text{opt}}$   
 167 coefficients for each latitude band that is calibrated using: (i) the full dataset; and (ii) a bootstrap  
 168 resampling method that estimates their respective standard errors and used to approximate their  
 169 uncertainty range. We then fit the  $a_{\text{opt}}$  and  $b_{\text{opt}}$  derived from the full dataset (Table S2) with a  
 170 sigmoid function to account for the rapid change tropopause height between  $20^\circ$  and  $50^\circ$  N/S  
 171 (Santer et al., 2003),

$$a_{\text{opt}} = \frac{a_0}{1 + \exp(a_1 \times (|\text{lat}| - a_2))} + a_3, \quad (\text{S7})$$

$$b_{\text{opt}} = \frac{b_0}{1 + \exp(b_1 \times (|\text{lat}| - b_2))} + b_3, \quad (\text{S8})$$

172 where  $a_0 = 0.06262$ ,  $a_1 = 0.4589$ ,  $a_2 = 39.25$  and  $a_3 = 0.9522 \pm 0.04$ , and  $b_0 = 1.471$ ,  $b_1 = 0.4431$ ,  
 173  $b_2 = 18.76$  and  $b_3 = 1.433 \pm 0.25$ . The range of  $a_3$  and  $b_3$  is specified to cover the uncertainty  
 174 range of  $a_{\text{opt}}$  and  $b_{\text{opt}}$  that is derived from the bootstrap resampling method (Fig. S3). Given the  
 175 limited number of waypoints below  $0^\circ\text{N}$  ( $< 5\%$  of all data points in the IAGOS dataset), we  
 176 use the absolute latitude values in Eq. (S7) and (S8) assuming that the latitude effects are  
 177 symmetrical between the Northern and Southern Hemisphere. The  $\text{RHi}_{\text{max}}$  term in Eq. (S6) is  
 178 also revised and calculated as a function of  $T_w$  to ensure that the  $\text{RHi}_{\text{corrected}}$  is within the  
 179 maximum value permissible by thermodynamics (i.e.,  $\text{RH} < 100\%$ , and below the threshold  
 180 that leads to homogeneous ice nucleation and formation of natural cirrus clouds) (Pruppacher  
 181 et al., 2007; Kärcher and Lohmann, 2002; Tompkins et al., 2007),

$$\text{RHi}_{\max} = \begin{cases} \frac{p_{\text{liq}}(T_w)}{p_{\text{ice}}(T_w)} & , \text{ when } T_w > 235 \text{ K} \\ 1.67 + (1.45 - 1.67) \times \frac{(T_w - 190)}{(235 - 190)} & , \text{ when } T_w \leq 235 \text{ K} \end{cases} \quad (\text{S9})$$

182 where  $p_{\text{liq}}(T_w)$  and  $p_{\text{ice}}(T_w)$  are estimated using Eq. (S3) and (S4) respectively.

183 **Table S4: Comparison of the ISSR occurrence between the in-situ RHi measurements from the IAGOS**  
 184 **campaign in 2019 versus the RHi derived from the ERA5 HRES: (a) without humidity correction; and (b)**  
 185 **with the global humidity correction, c.f. Eq. (S6) to Eq. (S9). The comparison is segmented into latitude**  
 186 **intervals of 20° and altitude intervals of 4000 feet.  $Y_{\text{IAGOS}}$  indicates that the waypoint has an RHi > 100%**  
 187 **(ISSR occurrence) according to the IAGOS measurements, while  $N_{\text{IAGOS}}$  indicates the opposite. The**  
 188 **subscript ‘‘HRES’’ is used to indicate ISSR occurrence as provided by the ERA5 HRES. For (b), the metrics**  
 189 **that are highlighted in green (red) indicates that its performance has improved (degraded) relative to (a).**

|                                                             | No. of waypoints | $Y_{\text{IAGOS}}/Y_{\text{HRES}}$ (%) | $N_{\text{IAGOS}}/N_{\text{HRES}}$ (%) | $Y_{\text{IAGOS}}/N_{\text{HRES}}$ (%) | $N_{\text{IAGOS}}/Y_{\text{HRES}}$ (%) | Ratio <sup>a</sup> | CvM stat <sup>b</sup> | ETS <sup>c</sup> |       |
|-------------------------------------------------------------|------------------|----------------------------------------|----------------------------------------|----------------------------------------|----------------------------------------|--------------------|-----------------------|------------------|-------|
| <b>(a) IAGOS vs. ERA5 HRES (No RHi correction)</b>          |                  |                                        |                                        |                                        |                                        |                    |                       |                  |       |
| <b>0 - 20°N</b>                                             |                  |                                        |                                        |                                        |                                        |                    |                       |                  |       |
|                                                             | FL280-320        | 4615                                   | 5.26                                   | 81.0                                   | 8.21                                   | 5.53               | 0.486                 | 12.5             | 0.217 |
|                                                             | FL320-360        | 19580                                  | 6.38                                   | 79.5                                   | 7.56                                   | 6.56               | 0.152                 | 75.7             | 0.245 |
|                                                             | FL360-400        | 40529                                  | 6.60                                   | 78.5                                   | 5.96                                   | 8.98               | -0.336                | 78.5             | 0.237 |
| <b>20 - 40°N</b>                                            |                  |                                        |                                        |                                        |                                        |                    |                       |                  |       |
|                                                             | FL280-320        | 15989                                  | 4.32                                   | 86.1                                   | 4.98                                   | 4.58               | 0.087                 | 12.3             | 0.267 |
|                                                             | FL320-360        | 52857                                  | 5.08                                   | 86.6                                   | 4.97                                   | 3.31               | 0.502                 | 104.0            | 0.338 |
|                                                             | FL360-400        | 184583                                 | 3.30                                   | 89.7                                   | 2.89                                   | 4.12               | -0.297                | 53.5             | 0.289 |
| <b>40 - 60°N</b>                                            |                  |                                        |                                        |                                        |                                        |                    |                       |                  |       |
|                                                             | FL280-320        | 13867                                  | 12.9                                   | 72.1                                   | 10.2                                   | 4.86               | 1.089                 | 97.2             | 0.369 |
|                                                             | FL320-360        | 79438                                  | 8.96                                   | 78.6                                   | 8.09                                   | 4.39               | 0.844                 | 218.4            | 0.349 |
|                                                             | FL360-400        | 122404                                 | 3.41                                   | 89.1                                   | 4.76                                   | 2.71               | 0.755                 | 172.4            | 0.280 |
| <b>(b) IAGOS vs. ERA5 HRES (Global humidity correction)</b> |                  |                                        |                                        |                                        |                                        |                    |                       |                  |       |
| <b>0 - 20°N</b>                                             |                  |                                        |                                        |                                        |                                        |                    |                       |                  |       |
|                                                             | FL280-320        | 4615                                   | 4.46                                   | 81.6                                   | 9.01                                   | 4.88               | 0.849                 | 5.78             | 0.187 |
|                                                             | FL320-360        | 19580                                  | 5.32                                   | 80.5                                   | 8.62                                   | 5.55               | 0.552                 | 26.2             | 0.212 |
|                                                             | FL360-400        | 40529                                  | 5.90                                   | 79.6                                   | 6.66                                   | 7.80               | -0.146                | 10.6             | 0.224 |
| <b>20 - 40°N</b>                                            |                  |                                        |                                        |                                        |                                        |                    |                       |                  |       |
|                                                             | FL280-320        | 15989                                  | 3.88                                   | 86.9                                   | 5.41                                   | 3.85               | 0.404                 | 4.90             | 0.255 |
|                                                             | FL320-360        | 52857                                  | 4.70                                   | 87.0                                   | 5.36                                   | 2.94               | 0.824                 | 63.5             | 0.321 |
|                                                             | FL360-400        | 184583                                 | 3.11                                   | 90.1                                   | 3.08                                   | 3.72               | -0.171                | 7.79             | 0.283 |
| <b>40 - 60°N</b>                                            |                  |                                        |                                        |                                        |                                        |                    |                       |                  |       |
|                                                             | FL280-320        | 13867                                  | 15.2                                   | 70.3                                   | 7.82                                   | 6.71               | 0.166                 | 5.73             | 0.412 |
|                                                             | FL320-360        | 79438                                  | 11.1                                   | 76.6                                   | 5.98                                   | 6.33               | -0.056                | 14.4             | 0.397 |
|                                                             | FL360-400        | 122404                                 | 4.36                                   | 87.9                                   | 3.81                                   | 3.91               | -0.025                | 2.06             | 0.323 |

190 <sup>a</sup>: Ratio compares the false positive and false negative rate and is computed by  $\left(\frac{Y_{\text{IAGOS}}/N_{\text{HRES}}}{N_{\text{IAGOS}}/Y_{\text{HRES}}} - 1\right)$ . A positive value indicates  
 191 that the ERA5 HRES underpredicts ISSR occurrence, a value of zero indicates a symmetrical false positive and false negative  
 192 rate, while a negative value indicates that the ERA5 HRES overpredicts ISSR occurrence.

193 <sup>b</sup>: CvM test statistic, where a lower value indicates a better goodness-of-fit between the probability density function of the  
 194 measured and ERA5-derived RHi.

195 <sup>c</sup>: The equitable threat score (ETS) is calculated according to Appendix A of Gierens et al. (2020), where ETS = 1 indicates  
 196 that the ERA5-derived RHi is in perfect agreement with measurements, ETS = 0 indicates a completely random relationship,  
 197 while ETS < 0 indicates an inverse relationship between the measured and ERA5-derived RHi.

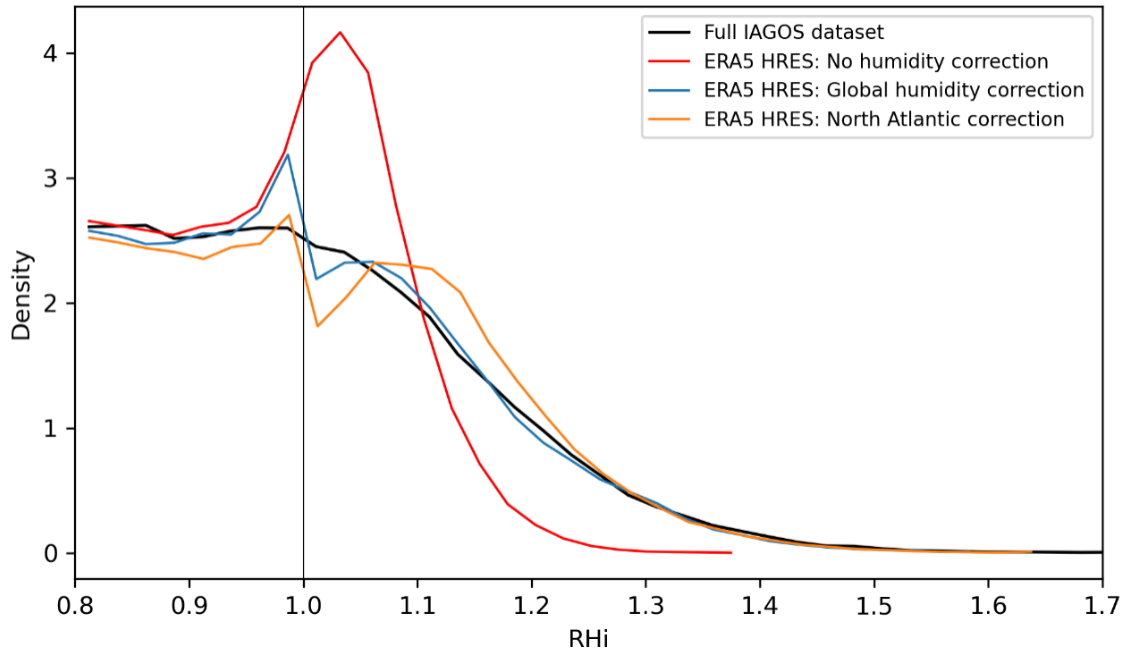

198

199 **Figure S4: Probability density function of the RHi measurements provided by the full IAGOS dataset**  
 200 **(black line) versus those derived from the ERA5 HRES with: (i) no humidity correction (red line); (ii) the**  
 201 **global humidity correction (blue line); and (iii) the North Atlantic correction previously developed by Teoh**  
 202 **et al. (2022) (orange line).**

203 When evaluated using four different performance metrics, the global humidity correction  
 204 generally improved the agreement between  $RHi_{IAGOS}$  and  $RHi_{corrected}$  for each latitude bin  
 205 (Table S1). Table S3 summarises the performance metrics when the full IAGOS dataset is  
 206 compared with the uncorrected and corrected ERA5 HRES global humidity fields, showing  
 207 that the weighted-mean:

- 208 i. percentage of waypoints with the correct prediction of ISSR occurrence ( $Y_{IAGOS}/Y_{HRES}$   
 209 and  $N_{IAGOS}/N_{HRES}$ ) increased by 0.2% from 90.9% to 91.1%,
- 210 ii. false positive ( $N_{IAGOS}/Y_{HRES}$ ) and false negative ( $Y_{IAGOS}/N_{HRES}$ ) rates are now  
 211 symmetrical, meaning that errors in the ISSR occurrence and persistent contrail  
 212 formation are expected to cancel out over the spatiotemporal domain,
- 213 iii. CvM test statistic reduced by 91% (from 134 to 12.4), which implies a significant  
 214 improvement in the goodness-of-fit between the probability density function of  
 215  $RHi_{IAGOS}$  and  $RHi_{corrected}$  (Fig. S4), and

216 iv. ETS improved slightly by 4.4% from 0.305 to 0.319, but the comparison at 0 – 40°N  
217 latitudes showed that the global humidity correction lowered the weighted-mean ETS  
218 by 3.9% from 0.281 to 0.270 (Table S1).

219 To evaluate the agreement between  $RH_{IAGOS}$  and  $RH_{corrected}$  at different altitudes, we also  
220 segmented the full IAGOS dataset by latitude intervals of 20° and altitude intervals of 4000  
221 feet (Table S4). The results showed that:

- 222 i. the CvM test statistic improved across every latitude and altitude categories,  
223 suggesting an improved goodness-of-fit between the probability density function of  
224  $RH_{IAGOS}$  and  $RH_{corrected}$ , but
- 225 ii. the weighted-mean ETS degraded from 0.286 to 0.275 (-3.8%) across all altitude  
226 intervals at lower latitudes (0 – 40°N), and
- 227 iii. the weighted-mean ratio of false negative-to-false positive rate  $\left(\frac{Y_{IAGOS}/N_{HRES}(\%)}{N_{IAGOS}/Y_{HRES}(\%)} - 1\right)$  at  
228 lower latitudes (0 – 40°N) and altitudes (28,000 – 36,000 feet) increased by around  
229 two-fold from 0.356 (no humidity correction) to 0.670 (with global humidity  
230 corrections applied). In other words, the uncorrected humidity fields are already  
231 underestimating the ISSR occurrence in this region (0 – 40°N and 28,000 – 36,000  
232 feet); and applying the global humidity correction could potentially worsen this  
233 underestimation.

234 Points (ii) and (iii) suggest that there could be potential limitations in the global humidity  
235 correction when applied at lower latitudes (0 – 40°N) and altitudes (28,000 – 36,000 feet),  
236 where the air traffic activity in this region (0 – 40°N and 28,000 – 36,000 feet) accounted for  
237 20.9% of the global annual flight distance flown in 2019. However, given the limited sample

238 size within this region (0 – 40°N and 28,000 – 36,000 feet, which collectively constitute only  
239 14% of the full IAGOS dataset), we have opted against any attempts to rectify these biases.

(a) ERA5 HRES: No humidity correction (9.93% ISSR coverage)

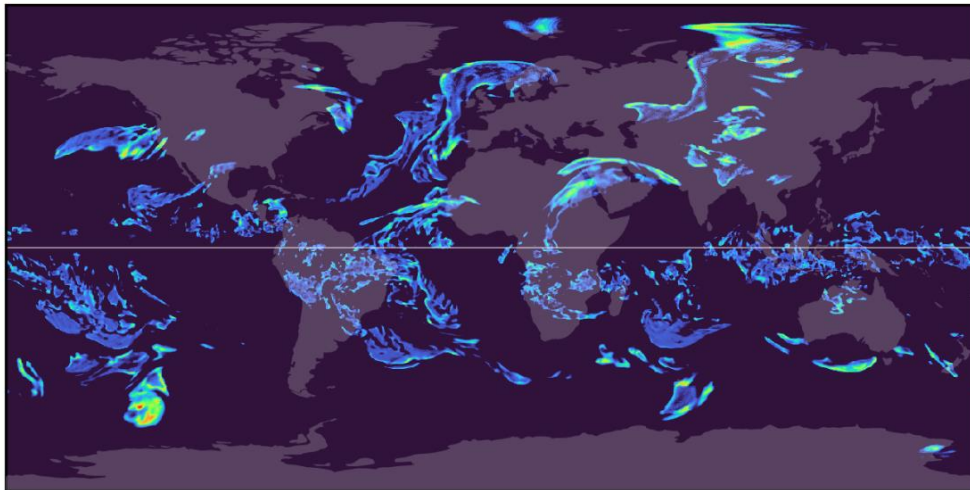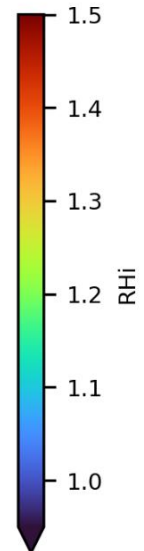

(b) ERA5 HRES: Global humidity correction (9.11% ISSR coverage)

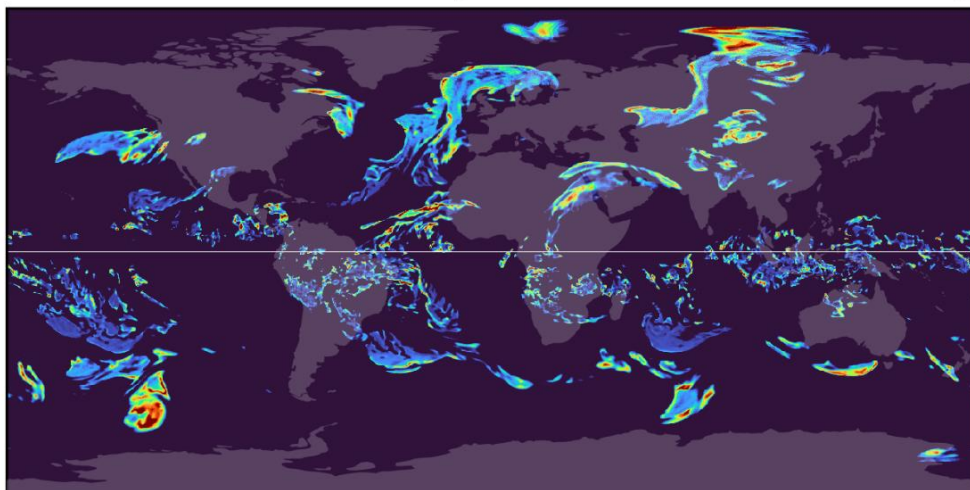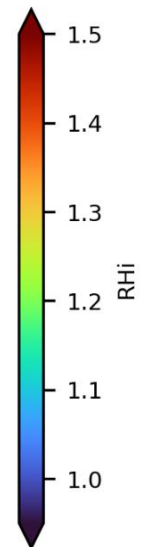

240

241 **Figure S5: Comparison of the magnitude and spatial distribution of the: (a) original RHi fields provided**  
242 **by the ERA5 HRES; versus (b) the corrected RHi fields from the global humidity correction at pressure**  
243 **level 22500 Pa (36,000 feet) on 1-January-2020 00:00:00 (UTC). Basemap plotted using Cartopy 0.22.0 and**  
244 **sourced from Natural Earth; licensed under public domain.**

245 Fig. S5 visualises the change in magnitude and spatial distribution of the uncorrected and

246 corrected ERA5-derived humidity fields. It shows that the global humidity correction leads to:

247 (i) a small reduction in ISSR coverage area at the tropics around the equator; (ii) an increase in

248 ISSR coverage area at latitudes above 40°N and below 40°S; and (iii) a higher occurrence of

249 localised regions with very high ice supersaturation ( $RHi > 140\%$ ). While the global humidity

250 correction ensures that the RHi distribution derived from the ERA5 HRES is more consistent  
 251 with  $RHi_{IAGOS}$  (Fig. S4), we note that: (i) there is a residual peak in  $RHi_{corrected}$  at close to 1.0  
 252 (Fig. S4) because humidity in a waypoint is only scaled upwards when  $a_{opt} < 1$  and  
 253  $RHi_{waypoint} > \left(\frac{RHi}{a_{opt}}\right)$ ; and (ii) RHi uncertainties at the individual waypoint level remains large  
 254 (Fig. S6). Both issues should be addressed in future research.

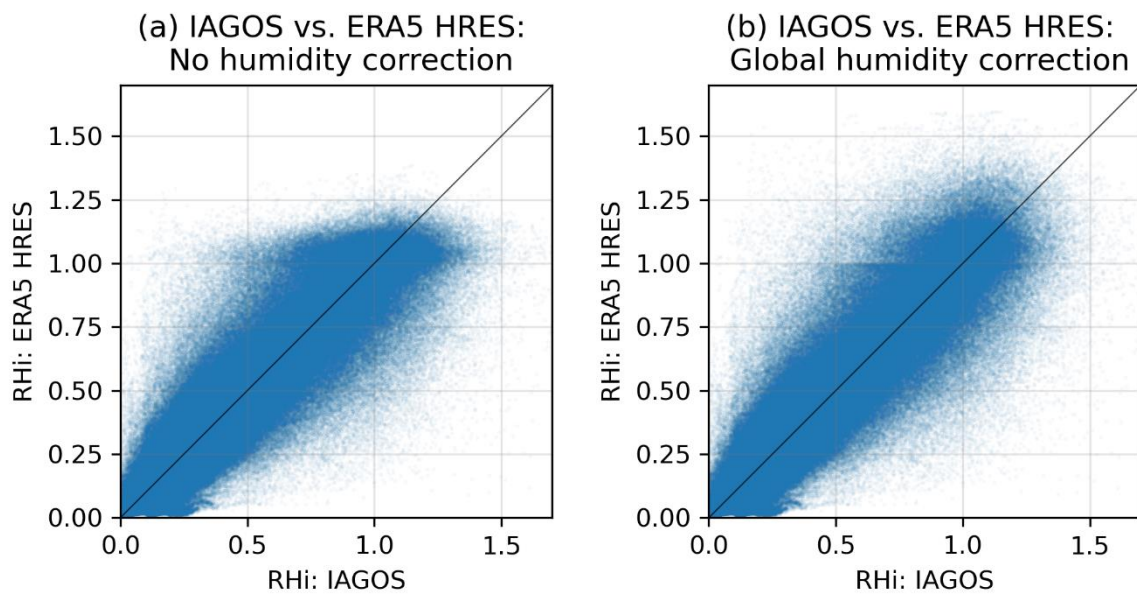

255  
 256 **Figure S6: Parity plots comparing the RHi derived from in-situ measurements from the IAGOS campaign**  
 257 **relative to: (a) the original RHi derived from the ERA5 HRES; and (b) the RHi when the global humidity**  
 258 **correction is applied to the ERA5 HRES (n = 682,308).**

## 259 S2 CoCiP model outputs

260 CoCiP is used to simulate the evolution and lifecycle of each contrail segment (Schumann,  
 261 2012; Schumann et al., 2012), and five different output formats are available:

- 262 • **contrail waypoint outputs**, which includes the local meteorology and simulated  
 263 contrail properties at each contrail waypoint and provided at time steps of  $dt$  (300 s)  
 264 from their formation to end of life,
- 265 • **flight waypoint outputs**, where the contrail waypoint outputs are aggregated back to  
 266 the original flight waypoints,



- 267 • **flight level outputs**, where the flight waypoint outputs are aggregated for each flight,
- 268 • **time slice outputs**, where the contrail and flight waypoint outputs are summarised at
- 269 time steps of 1 h, and
- 270 • **gridded outputs**, where the contrail and flight waypoint outputs are aggregated to a
- 271 grid with a  $0.5^\circ \times 0.5^\circ$  horizontal resolution and at a 1 h temporal resolution.

272 In this study, we use the: (i) flight level and time slice outputs to derive the annual and seasonal  
 273 statistics; (ii) gridded outputs to estimate the regional air traffic and contrail properties, where  
 274 the spatial bounding boxes that defines each region were used in previous studies (Wilkerson  
 275 et al., 2010; Hoare, 2014; Teoh et al., 2024) and reproduced in Table S5 and Fig. 2 in the main  
 276 text; and (iii) contrail waypoint outputs to identify the set of conditions that produces strongly  
 277 warming/cooling contrail segments.

278 **Table S5: Spatial bounding boxes used to estimate the regional air traffic, emissions, and contrail**  
 279 **properties.**

| Region               | Bounding box |          |          |          | Surface area<br>( $\times 10^{13} \text{ m}^2$ ) | Global surface area* |
|----------------------|--------------|----------|----------|----------|--------------------------------------------------|----------------------|
| USA                  | (126° W,     | 23° N,   | 66° W,   | 50° N)   | 1.6005                                           | 3.1%                 |
| Europe               | (12° W,      | 35° N,   | 20° E,   | 60° N)   | 0.6662                                           | 1.3%                 |
| East Asia            | (103° E,     | 15° N,   | 150° E,  | 48° N)   | 1.6170                                           | 3.2%                 |
| Southeast Asia       | (87.5° E,    | 10° S,   | 130° E,  | 20° N)   | 1.5533                                           | 3.1%                 |
| Latin America        | (85° W,      | 60° S,   | 35° W,   | 15° N)   | 3.9774                                           | 7.8%                 |
| Africa & Middle East | (20° W,      | 35° S,   | 50° E,   | 40° N)   | 6.0334                                           | 12%                  |
| China                | (73.5° E,    | 18° N,   | 135° E,  | 53.5° N) | 2.1628                                           | 4.2%                 |
| India                | (68° E,      | 8° N,    | 97.5° E, | 35.5° N) | 0.9244                                           | 1.8%                 |
| North Atlantic       | (70° W,      | 40° N,   | 5° W,    | 63° N)   | 1.1493                                           | 2.3%                 |
| North Pacific        | (140° E,     | 35° N,   | 120° W,  | 65° N)   | 2.3577                                           | 4.6%                 |
| Arctic Region        | (180° W,     | 66.5° N, | 180° E,  | 90° N)   | 2.1548                                           | 4.2%                 |

280 \* There are some overlapping between regional bounding boxes (Fig. 2 in the main text), and therefore, the  
 281 summation of regional statistics does not add up to 100%.

282

283

284

285



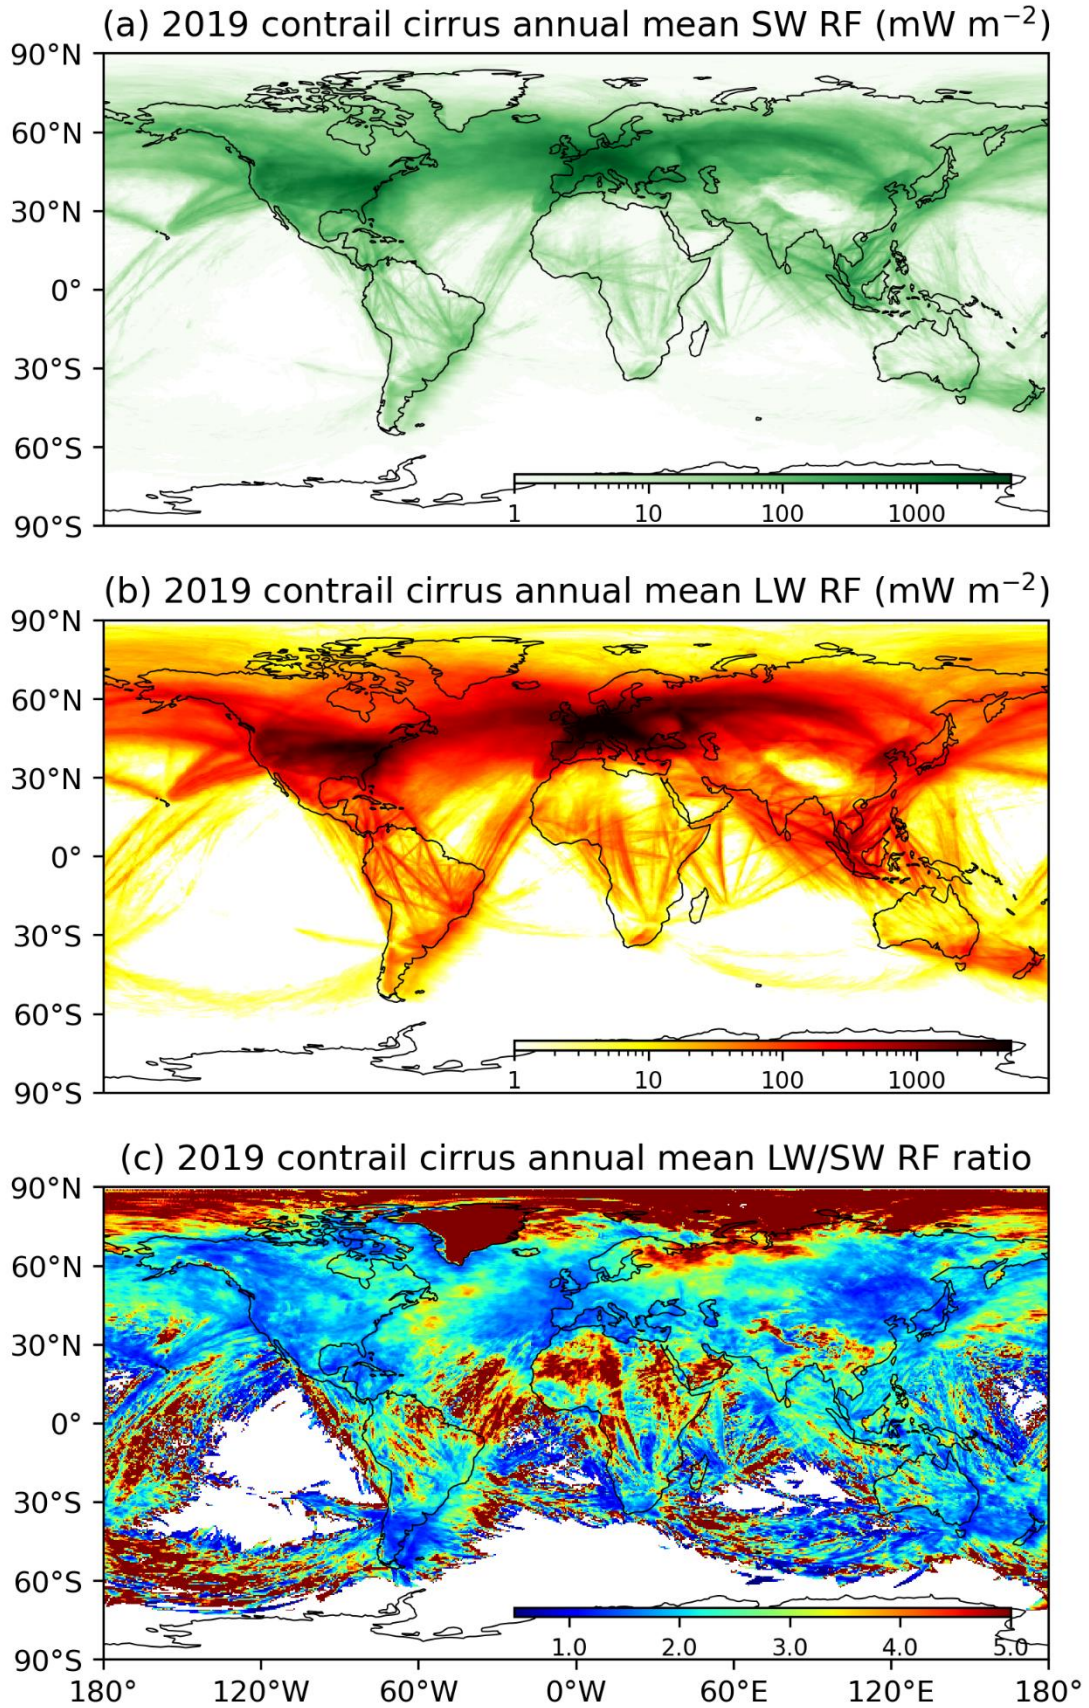

286

287 **Figure S7: The 2019 global annual mean contrail cirrus: (a) SW RF; (b) LW RF; and (c) the ratio of LW-**  
 288 **to-SW RF. Basemap plotted using Cartopy 0.22.0 and sourced from Natural Earth; licensed under public**  
 289 **domain.**

290 **S3 Global contrail simulation**

291 The global annual mean contrail cirrus net RF is estimated to be  $62.1 \text{ mW m}^{-2}$  in 2019,  $27.3$   
292  $\text{mW m}^{-2}$  in 2020, and  $31.7 \text{ mW m}^{-2}$  in 2021 with significant regional variabilities. Table 2 in  
293 the main text summarises the regional air traffic, emissions, and contrail statistics for 2019,  
294 while Tables S6 and S7 presents the same regional statistics for 2020 and 2021. Fig. 3a in the  
295 main text shows the global annual mean contrail cirrus net RF, while Fig. S7 shows the global  
296 annual mean contrail SW and LW RF and estimates the ratio of contrail LW-to-SW RF. One  
297 of the factors contributing to variability in the regional annual mean contrail net RF is the  
298 differences in air traffic patterns. Fig. S8 shows that: (i) flights over the North Atlantic are  
299 predominantly flown at cruising altitudes, which likely led to a larger percentage of flight  
300 distance forming persistent contrails ( $p_{\text{contrail}}$ ); while (ii) flights in the Chinese airspace are  
301 generally flown at lower cruising altitudes, which could contribute to a smaller  $p_{\text{contrail}}$ .

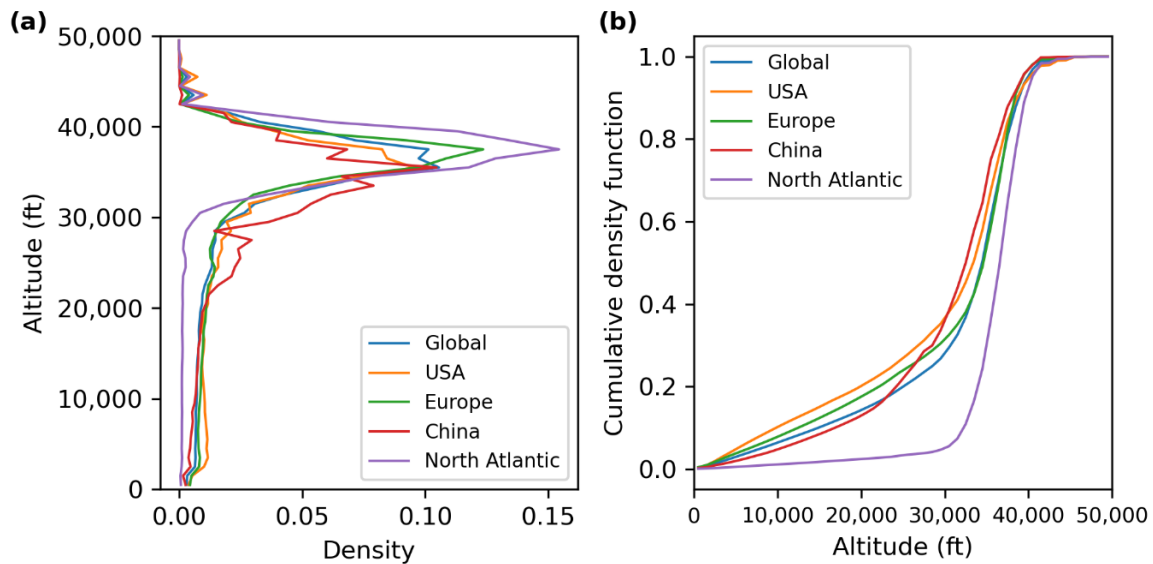

302  
303 **Figure S8: The (a) probability density function and (b) cumulative density function of the 2019 annual flight**  
304 **distance flown across the globe (blue lines) and over the USA (orange lines), Europe (green lines), China**  
305 **(red lines) and the North Atlantic (purple lines).**

306 **Table S6: Regional air traffic activity, emissions, and contrail properties for 2020.**

| Regional statistics: 2020                                                        | Global  | USA    | Europe | East Asia | SEA    | Latin America | Africa & Middle East | China  | India  | North Atlantic | North Pacific | Arctic Region |
|----------------------------------------------------------------------------------|---------|--------|--------|-----------|--------|---------------|----------------------|--------|--------|----------------|---------------|---------------|
| Annual distance flown (x10 <sup>9</sup> km)                                      | 34.50   | 11.27  | 3.592  | 6.298     | 1.569  | 1.071         | 2.015                | 6.848  | 1.257  | 1.159          | 1.615         | 0.1600        |
| - Percentage relative to global values <sup>a</sup>                              | -       | 32.7%  | 10.4%  | 18.3%     | 4.5%   | 3.1%          | 5.8%                 | 19.8%  | 3.6%   | 3.4%           | 4.7%          | 0.5%          |
| Annual dist. flown above FL250 (x10 <sup>9</sup> km)                             | 26.33   | 7.84   | 2.742  | 4.372     | 1.227  | 0.852         | 1.714                | 4.846  | 1.040  | 1.111          | 1.352         | 0.1513        |
| - Percentage relative to global values <sup>a</sup>                              | -       | 29.8%  | 10.4%  | 16.6%     | 4.7%   | 3.2%          | 6.5%                 | 18.4%  | 3.9%   | 4.2%           | 5.1%          | 0.6%          |
| Air traffic density (km <sup>-1</sup> h <sup>-1</sup> )                          | 0.008   | 0.080  | 0.062  | 0.044     | 0.012  | 0.003         | 0.004                | 0.036  | 0.016  | 0.012          | 0.008         | 0.001         |
| Fuel burn (Tg)                                                                   | 146.000 | 32.400 | 14.600 | 29.500    | 7.730  | 4.450         | 9.910                | 31.600 | 6.200  | 6.830          | 10.800        | 1.140         |
| Mean nvPM EI <sub>n</sub> (x10 <sup>15</sup> kg <sup>-1</sup> )                  | 1.016   | 1.328  | 1.085  | 1.136     | 0.913  | 0.954         | 0.810                | 1.149  | 1.010  | 0.569          | 0.646         | 0.413         |
| Mean nvPM per dist. (x10 <sup>12</sup> m <sup>-1</sup> )                         | 4.265   | 3.82   | 4.41   | 5.32      | 4.50   | 3.96          | 3.98                 | 5.30   | 4.98   | 3.36           | 4.32          | 2.95          |
| Persistent contrail length (x10 <sup>9</sup> km)                                 | 1.40    | 0.429  | 0.237  | 0.0700    | 0.0618 | 0.0357        | 0.0493               | 0.0907 | 0.0215 | 0.107          | 0.0805        | 0.0193        |
| - Percentage relative to global values <sup>a</sup>                              | -       | 30.6%  | 16.9%  | 5.0%      | 4.4%   | 2.5%          | 3.5%                 | 6.5%   | 1.5%   | 7.6%           | 5.7%          | 1.4%          |
| Dist. forming persistent contrails                                               | 4.07%   | 3.81%  | 6.60%  | 1.11%     | 3.94%  | 3.33%         | 2.45%                | 1.32%  | 1.71%  | 9.2%           | 4.98%         | 12.06%        |
| Area-mean contrail optical depth, $\tau$                                         | 0.014   | 0.043  | 0.049  | 0.020     | 0.014  | 0.012         | 0.011                | 0.020  | 0.015  | 0.027          | 0.020         | 0.023         |
| Mean contrail age in domain (h)                                                  | 2.34    | 1.97   | 2.01   | 2.46      | 2.98   | 3.04          | 2.66                 | 2.48   | 2.58   | 2.36           | 2.64          | 3.98          |
| Contrail cirrus coverage (%)                                                     | 0.03    | 0.18   | 0.43   | 0.02      | 0.01   | 0.003         | 0.01                 | 0.05   | 0.01   | 0.12           | 0.04          | 0.03          |
| Contrail cirrus coverage, clear sky (%)                                          | 0.28    | 2.7    | 3.6    | 0.43      | 0.24   | 0.03          | 0.04                 | 0.41   | 0.11   | 1.1            | 0.28          | 0.09          |
| Annual mean SW RF (mW m <sup>-2</sup> )                                          | -26.4   | -241   | -359   | -40.1     | -38.9  | -6.54         | -7.74                | -42.7  | -19.1  | -77.2          | -29.0         | -3.69         |
| Annual mean LW RF (mW m <sup>-2</sup> )                                          | 53.8    | 444    | 699    | 69.5      | 72.8   | 15.0          | 14.9                 | 73.9   | 41.8   | 181            | 56.8          | 20.6          |
| Annual mean Net RF (mW m <sup>-2</sup> )                                         | 27.3    | 203    | 339    | 29.3      | 33.8   | 8.42          | 7.15                 | 31.2   | 22.6   | 104            | 27.7          | 17.0          |
| Ratio: LW/SW RF                                                                  | 2.04    | 1.84   | 1.95   | 1.73      | 1.87   | 2.29          | 1.93                 | 1.73   | 2.19   | 2.34           | 1.96          | 5.58          |
| EF <sub>contrail</sub> (x10 <sup>18</sup> J)                                     | 441     | 103    | 71.4   | 15.0      | 16.6   | 10.6          | 13.6                 | 21.3   | 6.61   | 37.6           | 20.8          | 11.6          |
| - Percentage relative to global values <sup>a</sup>                              | -       | 23.4%  | 16.2%  | 3.4%      | 3.8%   | 2.4%          | 3.1%                 | 4.8%   | 1.5%   | 8.5%           | 4.7%          | 2.6%          |
| EF <sub>contrail, initial location</sub> (x10 <sup>18</sup> J) <sup>b</sup>      | 441     | 106    | 79.4   | 15.0      | 16.8   | 10.7          | 13.7                 | 20.2   | 6.41   | 39.3           | 21.1          | 9.18          |
| - Percentage relative to global values <sup>a</sup>                              | -       | 24.0%  | 18.0%  | 3.4%      | 3.8%   | 2.4%          | 3.1%                 | 4.6%   | 1.5%   | 8.9%           | 4.8%          | 2.1%          |
| Ratio: EF <sub>contrail</sub> /EF <sub>contrail, initial</sub> <sup>c</sup>      | 1.00    | 0.97   | 0.90   | 1.00      | 0.99   | 0.99          | 0.99                 | 1.05   | 1.03   | 0.96           | 0.99          | 1.26          |
| EF <sub>contrail</sub> per flight distance (x10 <sup>8</sup> J m <sup>-1</sup> ) | 0.128   | 0.094  | 0.221  | 0.024     | 0.107  | 0.100         | 0.068                | 0.029  | 0.051  | 0.339          | 0.131         | 0.574         |
| EF <sub>contrail</sub> per contrail length (x10 <sup>8</sup> J m <sup>-1</sup> ) | 3.14    | 2.47   | 3.35   | 2.14      | 2.72   | 3.00          | 2.78                 | 2.23   | 2.98   | 3.67           | 2.62          | 4.76          |

307 <sup>a</sup>: There are some overlapping between regional bounding boxes (Fig. 2 in the main text), and therefore, the summation of regional statistics does not add up to 100%.

308 <sup>b</sup>: The total EF<sub>contrail</sub> throughout the contrail lifetime is added back to the location where contrails were initially formed.

309 <sup>c</sup>: A higher ratio indicates that a larger share of contrail climate forcing is from contrails initially formed outside of the region but subsequently advected into the domain.

310 **Table S7: Regional air traffic activity, emissions, and contrail properties for 2021.**

| Regional statistics: 2021                                                           | Global  | USA    | Europe | East Asia | SEA    | Latin America | Africa & Middle East | China  | India  | North Atlantic | North Pacific | Arctic Region |
|-------------------------------------------------------------------------------------|---------|--------|--------|-----------|--------|---------------|----------------------|--------|--------|----------------|---------------|---------------|
| Annual distance flown ( $\times 10^9$ km)                                           | 41.90   | 15.17  | 4.475  | 5.948     | 1.208  | 1.479         | 2.795                | 6.654  | 1.438  | 1.441          | 1.741         | 0.1930        |
| - Percentage relative to global values <sup>a</sup>                                 | -       | 36.2%  | 10.7%  | 14.2%     | 2.9%   | 3.5%          | 6.7%                 | 15.9%  | 3.4%   | 3.4%           | 4.2%          | 0.5%          |
| Annual dist. flown above FL250 ( $\times 10^9$ km)                                  | 31.70   | 10.40  | 3.432  | 4.089     | 0.995  | 1.143         | 2.343                | 4.694  | 1.158  | 1.382          | 1.445         | 0.1791        |
| - Percentage relative to global values <sup>a</sup>                                 | -       | 32.8%  | 10.8%  | 12.9%     | 3.1%   | 3.6%          | 7.4%                 | 14.8%  | 3.7%   | 4.4%           | 4.6%          | 0.6%          |
| Air traffic density ( $\text{km}^{-1} \text{h}^{-1}$ )                              | 0.009   | 0.108  | 0.077  | 0.042     | 0.009  | 0.004         | 0.005                | 0.035  | 0.018  | 0.014          | 0.008         | 0.001         |
| Fuel burn (Tg)                                                                      | 166.000 | 42.500 | 16.800 | 27.800    | 6.140  | 5.640         | 12.590               | 30.200 | 6.390  | 8.350          | 11.500        | 1.330         |
| Mean nvPM EI <sub>n</sub> ( $\times 10^{15} \text{kg}^{-1}$ )                       | 1.021   | 1.317  | 1.061  | 1.088     | 0.774  | 0.950         | 0.817                | 1.116  | 1.024  | 0.540          | 0.604         | 0.381         |
| Mean nvPM per dist. ( $\times 10^{12} \text{m}^{-1}$ )                              | 4.009   | 3.69   | 3.98   | 5.09      | 3.93   | 3.62          | 3.68                 | 5.06   | 4.55   | 3.13           | 3.99          | 2.62          |
| Persistent contrail length ( $\times 10^9$ km)                                      | 1.73    | 0.538  | 0.266  | 0.0813    | 0.0753 | 0.0568        | 0.0721               | 0.104  | 0.0328 | 0.137          | 0.1000        | 0.0140        |
| - Percentage relative to global values <sup>a</sup>                                 | -       | 31.1%  | 15.4%  | 4.7%      | 4.3%   | 3.3%          | 4.2%                 | 6.0%   | 1.9%   | 7.9%           | 5.8%          | 0.8%          |
| Dist. forming persistent contrails                                                  | 4.13%   | 3.55%  | 5.94%  | 1.37%     | 6.23%  | 3.84%         | 2.58%                | 1.56%  | 2.28%  | 9.5%           | 5.74%         | 7.26%         |
| Area-mean contrail optical depth, $\tau$                                            | 0.012   | 0.046  | 0.046  | 0.021     | 0.014  | 0.012         | 0.010                | 0.020  | 0.015  | 0.027          | 0.021         | 0.022         |
| Mean contrail age in domain (h)                                                     | 2.25    | 1.91   | 1.93   | 2.47      | 3.06   | 3.16          | 2.55                 | 2.48   | 2.56   | 2.35           | 2.62          | 3.72          |
| Contrail cirrus coverage (%)                                                        | 0.04    | 0.21   | 0.55   | 0.02      | 0.01   | 0.006         | 0.01                 | 0.05   | 0.01   | 0.20           | 0.05          | 0.02          |
| Contrail cirrus coverage, clear sky (%)                                             | 0.33    | 3.3    | 3.9    | 0.52      | 0.26   | 0.06          | 0.06                 | 0.50   | 0.19   | 1.2            | 0.37          | 0.04          |
| Annual mean SW RF ( $\text{mW m}^{-2}$ )                                            | -33.0   | -304   | -420   | -47.8     | -45.1  | -10.0         | -9.95                | -50.5  | -27.3  | -104           | -36.6         | -4.18         |
| Annual mean LW RF ( $\text{mW m}^{-2}$ )                                            | 64.8    | 545    | 773    | 79.2      | 86.3   | 22.8          | 19.8                 | 85.2   | 60.6   | 234            | 70.7          | 13.7          |
| Annual mean Net RF ( $\text{mW m}^{-2}$ )                                           | 31.7    | 240    | 352    | 31.3      | 41.1   | 12.8          | 9.79                 | 34.7   | 33.2   | 130            | 34.0          | 9.56          |
| Ratio: LW/SW RF                                                                     | 1.96    | 1.79   | 1.84   | 1.66      | 1.91   | 2.28          | 1.99                 | 1.69   | 2.22   | 2.25           | 1.93          | 3.28          |
| EF <sub>contrail</sub> ( $\times 10^{18} \text{J}$ )                                | 511     | 121    | 74     | 15.9      | 20.1   | 16            | 18.6                 | 23.6   | 9.67   | 47.1           | 25.4          | 6.51          |
| - Percentage relative to global values <sup>a</sup>                                 | -       | 23.7%  | 14.5%  | 3.1%      | 3.9%   | 3.1%          | 3.6%                 | 4.6%   | 1.9%   | 9.2%           | 5.0%          | 1.3%          |
| EF <sub>contrail, initial location</sub> ( $\times 10^{18} \text{J}$ ) <sup>b</sup> | 511     | 125    | 77.2   | 16.1      | 20.3   | 16.5          | 19.5                 | 21.8   | 9.63   | 48.7           | 25.3          | 5.26          |
| - Percentage relative to global values <sup>a</sup>                                 | -       | 24.5%  | 15.1%  | 3.2%      | 4.0%   | 3.2%          | 3.8%                 | 4.3%   | 1.9%   | 9.5%           | 5.0%          | 1.0%          |
| Ratio: EF <sub>contrail</sub> /EF <sub>contrail, initial</sub> <sup>c</sup>         | 1.00    | 0.97   | 0.96   | 0.99      | 0.99   | 0.97          | 0.95                 | 1.08   | 1.00   | 0.97           | 1.00          | 1.24          |
| EF <sub>contrail</sub> per flight distance ( $\times 10^8 \text{J m}^{-1}$ )        | 0.122   | 0.082  | 0.173  | 0.027     | 0.168  | 0.112         | 0.070                | 0.033  | 0.067  | 0.338          | 0.145         | 0.273         |
| EF <sub>contrail</sub> per contrail length ( $\times 10^8 \text{J m}^{-1}$ )        | 2.95    | 2.32   | 2.90   | 1.98      | 2.70   | 2.90          | 2.70                 | 2.10   | 2.94   | 3.55           | 2.53          | 3.76          |

311 <sup>a</sup>: There are some overlapping between regional bounding boxes (Fig. 2 in the main text), and therefore, the summation of regional statistics does not add up to 100%.

312 <sup>b</sup>: The total EF<sub>contrail</sub> throughout the contrail lifetime is added back to the location where contrails were initially formed.

313 <sup>c</sup>: A higher ratio indicates that a larger share of contrail climate forcing is from contrails initially formed outside of the region but subsequently advected into the domain.

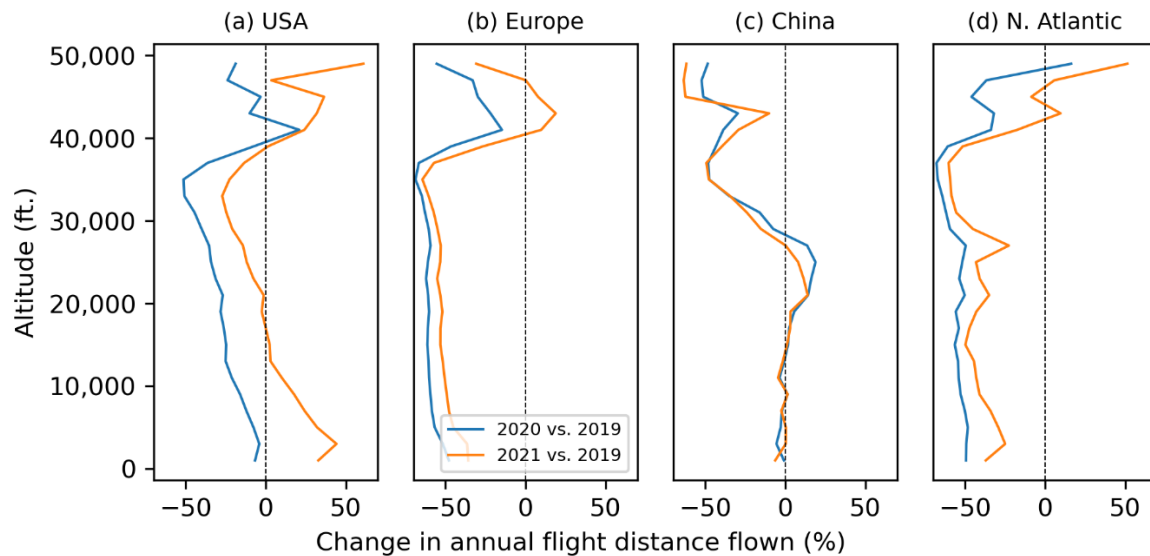

314

315 **Figure S9: The percentage change in annual flight distance flown by altitude over the (a) USA; (b) Europe;**  
 316 **(c) China; and (d) North Atlantic when comparing the air traffic in 2019 versus 2020 (blue lines) and 2021**  
 317 **(orange lines).**

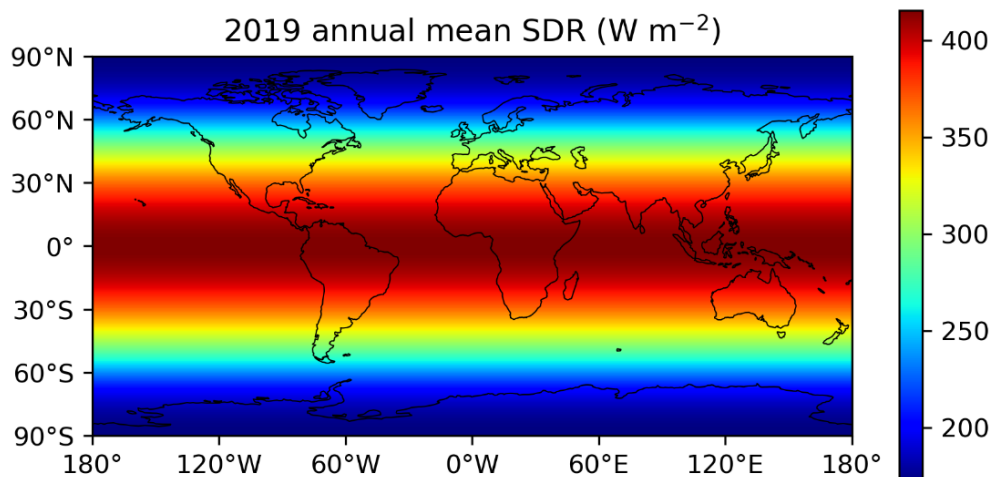

318

319 **Figure S10: The 2019 global annual mean solar direct radiation that is provided by the ERA5 HRES.**  
 320 **Basemap plotted using Cartopy 0.22.0 and sourced from Natural Earth; licensed under public domain.**

321 Over the USA, Europe and North Atlantic, Fig. S9 shows that the COVID-19 pandemic led to  
 322 significant reductions in air traffic activity between 20,000 and 40,000 feet, but there are only  
 323 small changes in air traffic activity above 40,000 feet, likely due to a higher share of private  
 324 business jets (ICAO, 2021; Sobieralski and Mumbower, 2022). The reduction in annual mean  
 325 contrail net RF in East Asia and China (50 – 54%) is significantly larger than the change in  
 326 flight distance flown (-24%), and this is most likely due to the: (i) lower share of international  
 327 overflights which led to a 39% reduction in air traffic activity above 30,000 feet; and (ii) higher



328 share of domestic air traffic in parts of China (Fig. 6a in the main text) that caused an 8%  
329 increase in flight distance flown between 25,000 and 30,000 feet (Fig. S9c) where persistent  
330 contrail formation is less likely.

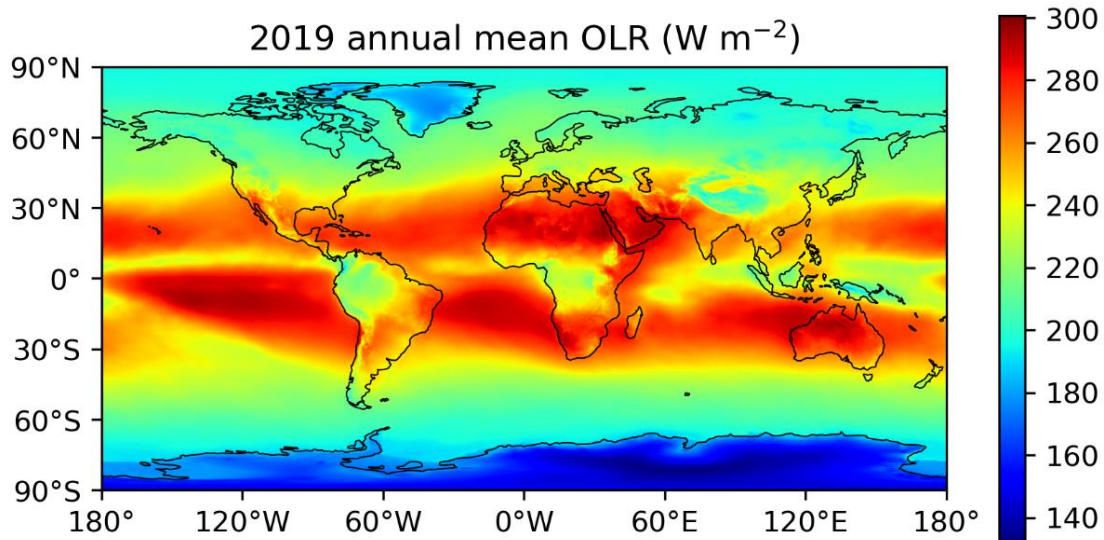

331  
332 **Figure S11: The 2019 global annual mean outgoing longwave radiation that is provided by the ERA5**  
333 **HRES. Basemap plotted using Cartopy 0.22.0 and sourced from Natural Earth; licensed under public**  
334 **domain.**

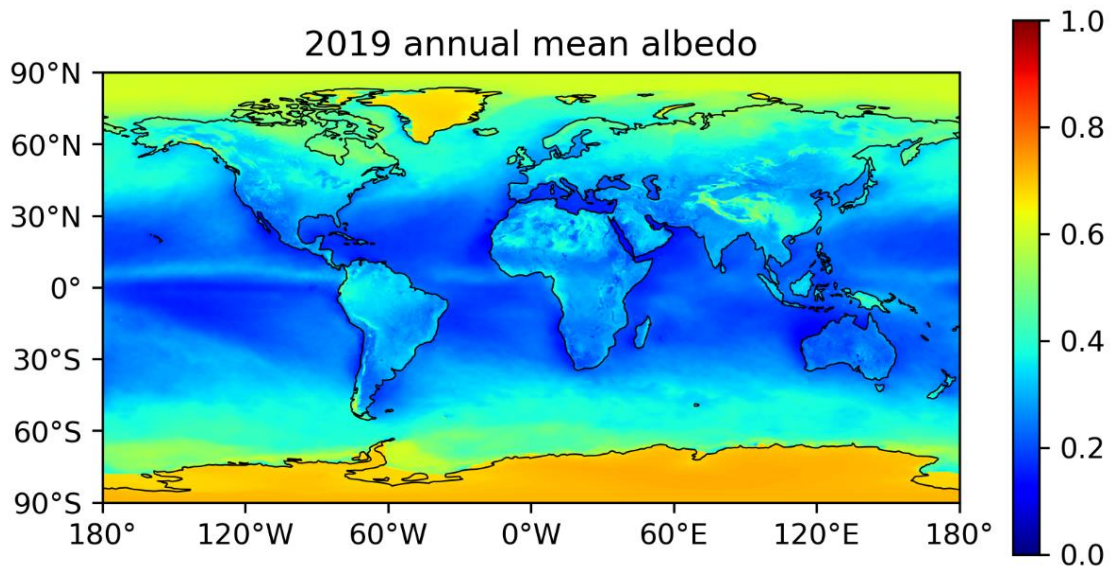

335  
336 **Figure S12: The 2019 global annual mean surface and cloud albedo as derived by dividing the annual mean**  
337 **reflected solar radiation by the solar direct radiation at each grid cell. Basemap plotted using Cartopy**  
338 **0.22.0 and sourced from Natural Earth; licensed under public domain.**

339 The solar direct radiation (SDR) and effective albedo, i.e., the proportion of solar radiation  
340 reflected by the surface and natural cirrus and calculated by dividing the reflected solar  
341 radiation (RSR) with the SDR, impact the contrail shortwave (SW) RF; while the magnitude

342 of outgoing longwave radiation (OLR) influences the contrail longwave (LW) RF. Fig. S10 to  
 343 S13 shows the spatial variations in global annual mean SDR, OLR, effective albedo, and the  
 344 ratio of SDR-to-OLR, where: (i) the subtropics and Sahara Desert tends to have a high relative  
 345 OLR (Fig. S11); (ii) the Arctic, Greenland and Antarctica have the highest effective albedo  
 346 (Fig. S12); and (iii) Southeast Asia have the highest ratio of SDR-to-OLR (Fig. S13) which  
 347 likely led to a higher probability of forming strongly cooling contrails. Fig. S14 shows the  
 348 monthly-averaged ISSR occurrence at different latitude bins, represented as a percentage of the  
 349 airspace volume. Notably, the ISSR occurrence at high latitudes ( $75^{\circ}\text{N} - 90^{\circ}\text{N}$ ) exhibits a larger  
 350 inter-annual variability relative to other latitude bands, likely due to its smaller grid cell area.  
 351 Additionally, the ISSR occurrence between December 2019 and April 2020 is also around two  
 352 times larger than the 2019–2021 annual averages. These factors, coupled with the low air traffic  
 353 activity at high latitudes (0.62% and 0.06% of the global annual flight distance were flown  
 354 above  $66.5^{\circ}\text{N}$  and below  $45^{\circ}\text{S}$  respectively), likely contributed to the large inter-annual  
 355 variability in  $p_{\text{contrail}}$  between 2019 and 2021, as presented in Fig. 5 in the main text.

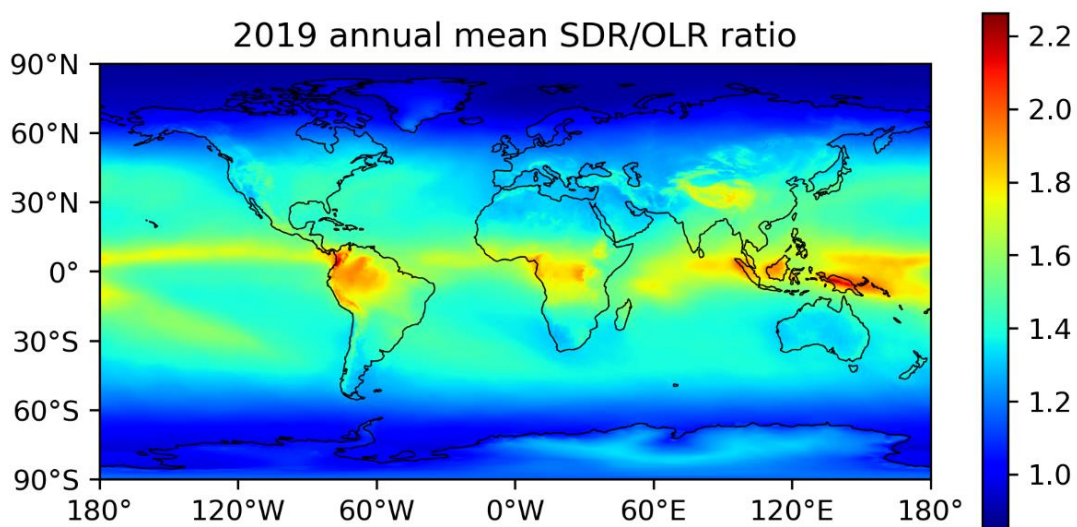

356  
 357 **Figure S13:** The ratio of the annual mean solar direct radiation (SDR) to the annual mean outgoing  
 358 longwave radiation (OLR) for 2019, where the SDR and OLR are provided by the ERA5 HRES. Basemap  
 359 plotted using Cartopy 0.22.0 and sourced from Natural Earth; licensed under public domain.

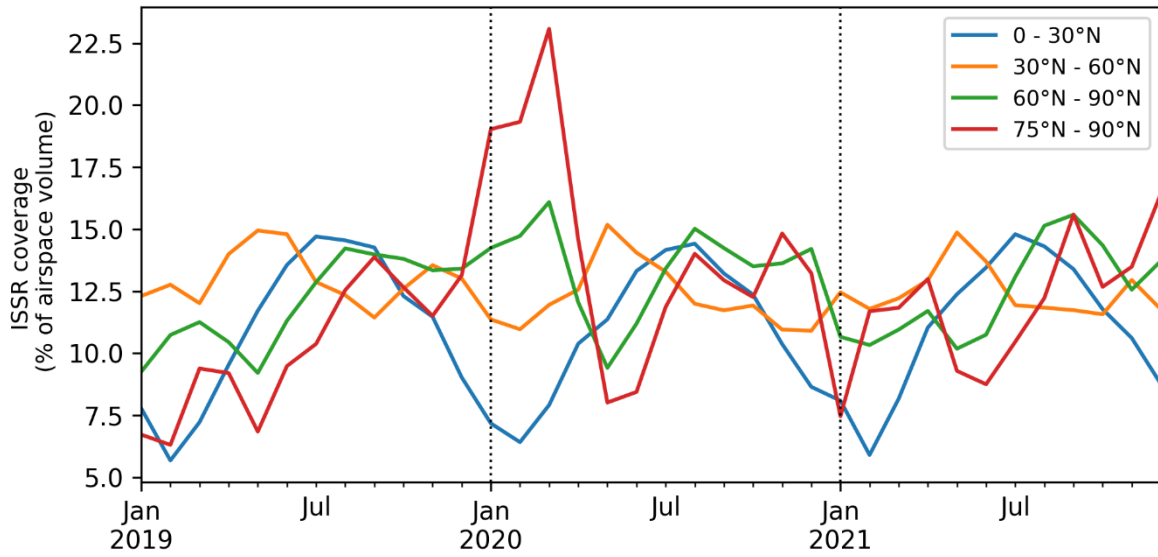

360

361 **Figure S14: Monthly average ISSR coverage, expressed as a percentage of airspace volume, from 2019 to**  
 362 **2021 across at different latitude bands: 0 – 30°N (blue line), 30°N – 60°N (orange line), 60°N – 90°N (green**  
 363 **line), and 75°N – 90°N (red line).**

364 Fig. 7 in the main text and Fig. S15 summarises the seasonal variations in: (i) global annual  
 365 flight distance flown; (ii) meteorological conditions where persistent contrails were initially  
 366 formed; fleet-aggregated (iii) non-volatile particulate matter (nvPM) emissions; (iv) fraction of  
 367 nvPM that formed ice crystals in persistent contrails; (v) mean contrail properties, such as the  
 368 volume-mean ice crystal radius ( $r_{ice}$ ), optical depth ( $\tau_{contrail}$ ), lifetime, coverage area, and  
 369 cloud-contrail overlap; and (vi) their associated RF and energy forcing ( $EF_{contrail}$ ) per unit  
 370 length of contrail.

371 **Table S8: The threshold of  $EF_{contrail}$  per flight distance flown by percentile.**

| Percentile       | $EF_{contrail}$ per flight distance ( $J m^{-1}$ ) |
|------------------|----------------------------------------------------|
| 1 <sup>st</sup>  | $-7.11 \times 10^8$                                |
| 5 <sup>th</sup>  | $-2.39 \times 10^8$                                |
| 33 <sup>rd</sup> | $1.00 \times 10^6$                                 |
| 50 <sup>th</sup> | $1.90 \times 10^7$                                 |
| 68 <sup>th</sup> | $1.97 \times 10^8$                                 |
| 95 <sup>th</sup> | $1.54 \times 10^9$                                 |
| 99 <sup>th</sup> | $2.85 \times 10^9$                                 |

372



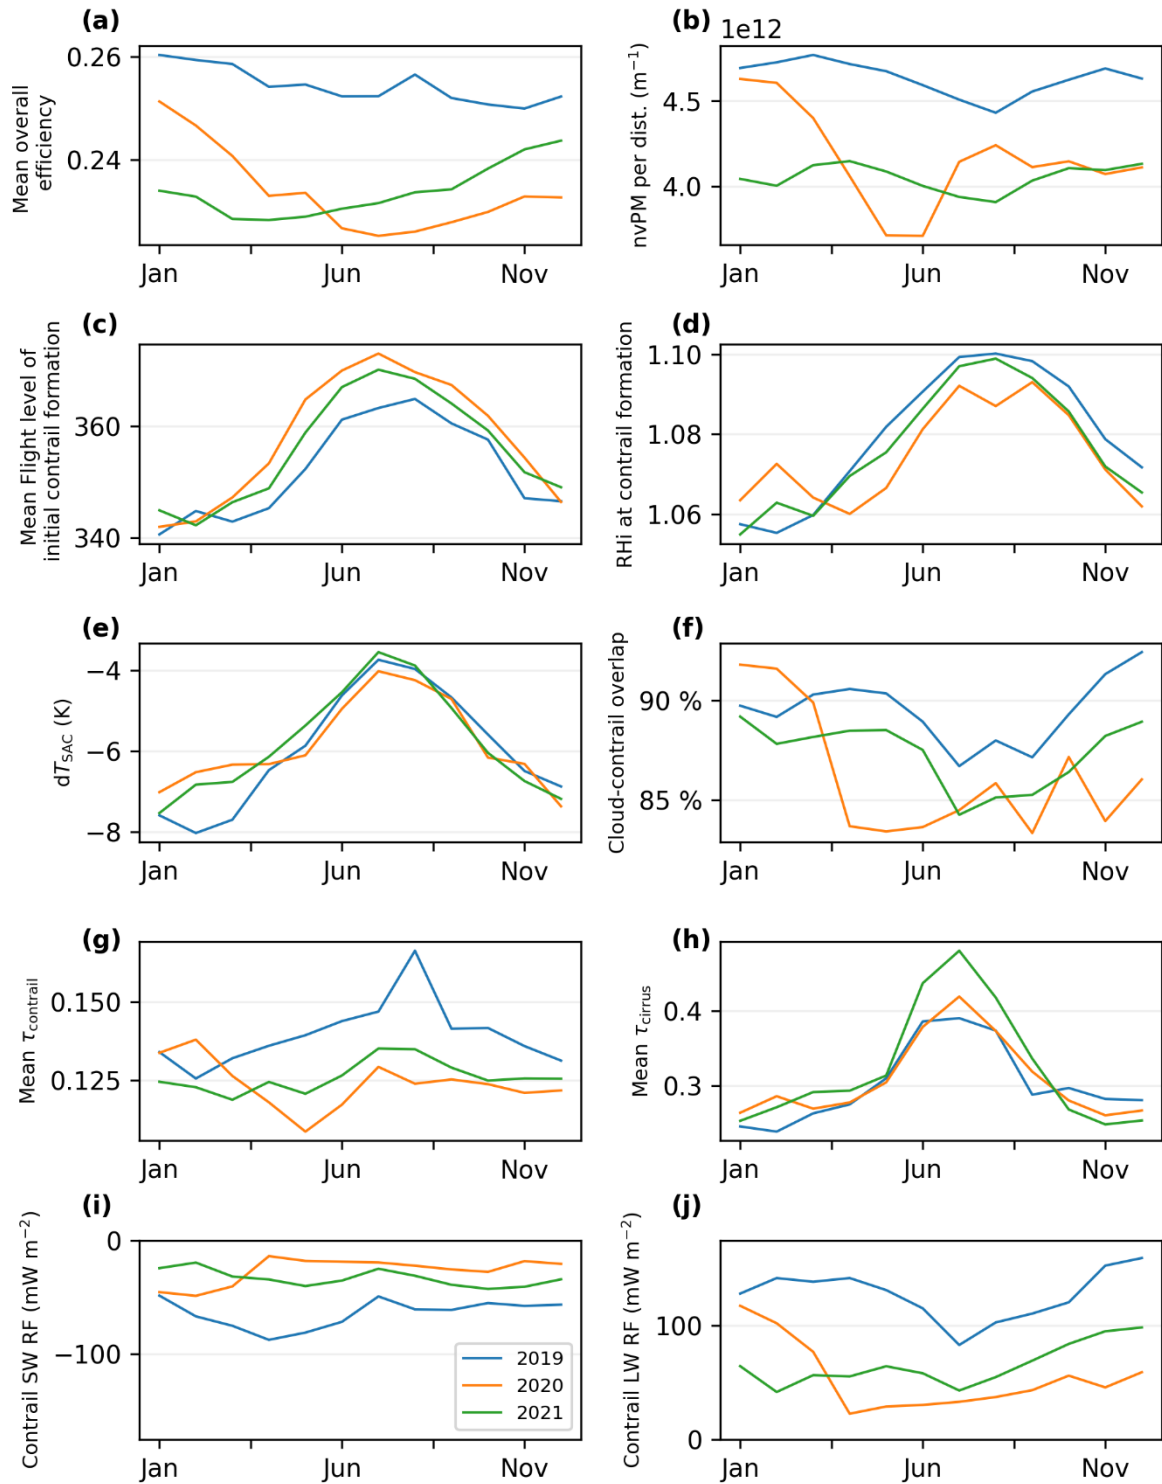

373

374 **Figure S15: Monthly statistics on the: (a) global fleet-aggregated mean overall efficiency and (b) nvPM per**  
 375 **flight distance flown; mean (c) flight level, (d) RHi, and (e) difference in the ambient temperature and**  
 376 **Schmidt-Appleman criterion threshold temperature ( $dT_{SAC}$ ) where contrails were initially formed; (f) mean**  
 377 **percentage of cloud-contrail overlap; the lifetime mean (g) contrail optical depth ( $\tau_{contrail}$ ) and (h) overlying**  
 378 **natural cirrus optical depth ( $\tau_{cirrus}$ ); and the global annual mean contrail (i) SW RF and (j) LW RF.**

379 **Table S9: Top 20 origin-destination airport pairs that contribute to the strongly warming contrail segments**  
 380 **( $EF_{\text{contrail}}$  per contrail length  $> 15.4 \times 10^8 \text{ J m}^{-1}$ , 95<sup>th</sup> percentile) that were presented in Fig. 9 in the main text.**

|    | Origin Airport                                   | Destination Airport                                    | % of flights* |
|----|--------------------------------------------------|--------------------------------------------------------|---------------|
| 1  | John F Kennedy International Airport             | London Heathrow Airport                                | 0.65          |
| 2  | Los Angeles International Airport                | John F Kennedy International Airport                   | 0.42          |
| 3  | Washington Dulles International Airport          | London Heathrow Airport                                | 0.38          |
| 4  | Ted Stevens Anchorage International Airport      | Louisville Muhammad Ali International Airport          | 0.33          |
| 5  | John F Kennedy International Airport             | Los Angeles International Airport                      | 0.32          |
| 6  | San Francisco International Airport              | John F Kennedy International Airport                   | 0.30          |
| 7  | Pointe-à-Pitre Le Raizet International Airport   | Paris-Orly Airport                                     | 0.29          |
| 8  | John F Kennedy International Airport             | Adolfo Suárez Madrid-Barajas Airport                   | 0.25          |
| 9  | John F Kennedy International Airport             | Charles de Gaulle International Airport                | 0.24          |
| 10 | Orlando International Airport                    | London Gatwick Airport                                 | 0.23          |
| 11 | Newark Liberty International Airport             | London Heathrow Airport                                | 0.23          |
| 12 | Logan International Airport                      | Seattle Tacoma International Airport                   | 0.22          |
| 13 | Philadelphia International Airport               | London Heathrow Airport                                | 0.22          |
| 14 | San Francisco International Airport              | London Heathrow Airport                                | 0.21          |
| 15 | Adolfo Suárez Madrid-Barajas Airport             | Licenciado Benito Juárez International Airport         | 0.21          |
| 16 | Miami International Airport                      | London Heathrow Airport                                | 0.21          |
| 17 | Miami International Airport                      | Charles de Gaulle International Airport                | 0.20          |
| 18 | Logan International Airport                      | Denver International Airport                           | 0.20          |
| 19 | Hartsfield Jackson Atlanta International Airport | Rome-Fiumicino Leonardo da Vinci International Airport | 0.20          |
| 20 | John F Kennedy International Airport             | Malpensa International Airport                         | 0.20          |

\* Percentage of the subset of flights that formed strongly warming contrail segments

381 **Table S10: Top 20 origin-destination airport pairs that contribute to the strongly cooling contrail segments**  
 382 **( $EF_{\text{contrail}}$  per contrail length  $< -2.39 \times 10^8 \text{ J m}^{-1}$ , 5<sup>th</sup> percentile) that were presented in Fig. 9 in the main text.**

|    | Origin Airport                               | Destination Airport                     | % of flights* |
|----|----------------------------------------------|-----------------------------------------|---------------|
| 1  | Singapore Changi Airport                     | Suvarnabhumi Airport                    | 0.61          |
| 2  | Abu Dhabi International Airport              | Soekarno-Hatta International Airport    | 0.54          |
| 3  | Soekarno-Hatta International Airport         | Narita International Airport            | 0.51          |
| 4  | Singapore Changi Airport                     | Hong Kong International Airport         | 0.47          |
| 5  | Dubai International Airport                  | Dallas Fort Worth International Airport | 0.47          |
| 6  | Sydney Kingsford Smith International Airport | Suvarnabhumi Airport                    | 0.47          |
| 7  | Brisbane International Airport               | Singapore Changi Airport                | 0.46          |
| 8  | Dubai International Airport                  | John F Kennedy International Airport    | 0.46          |
| 9  | Dubai International Airport                  | Singapore Changi Airport                | 0.44          |
| 10 | Dubai International Airport                  | Perth International Airport             | 0.43          |
| 11 | Shanghai Pudong International Airport        | Frankfurt am Main Airport               | 0.38          |
| 12 | Dubai International Airport                  | Melbourne International Airport         | 0.37          |
| 13 | Kuala Lumpur International Airport           | Taiwan Taoyuan International Airport    | 0.36          |
| 14 | Singapore Changi Airport                     | Brisbane International Airport          | 0.36          |
| 15 | Kuala Lumpur International Airport           | Soekarno-Hatta International Airport    | 0.36          |
| 16 | Beijing Capital International Airport        | Zürich Airport                          | 0.36          |
| 17 | Yuzhno-Sakhalinsk Airport                    | Novosibirsk Tolmachevo Airport          | 0.33          |
| 18 | Sydney Kingsford Smith International Airport | Hong Kong International Airport         | 0.32          |
| 19 | Soekarno-Hatta International Airport         | Hong Kong International Airport         | 0.32          |
| 20 | Incheon International Airport                | Ninoy Aquino International Airport      | 0.32          |

\* Percentage of the subset of flights that formed strongly cooling contrail segments

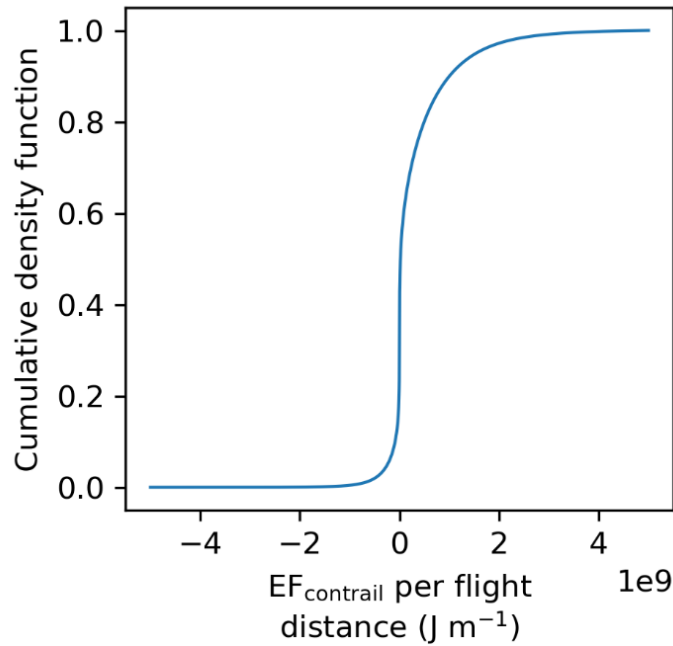

384

385 **Figure S16: Cumulative density function of the magnitude of  $EF_{\text{contrail}}$  per flight distance flown for every**  
 386 **flight segment that formed persistent contrails in 2019. The percentiles of the  $EF_{\text{contrail}}$  per flight distance is**  
 387 **presented in Table S8.**

388 Fig. S16 presents the cumulative density function of the  $EF_{\text{contrail}}$  per flight distance flown for  
 389 flight segments that formed persistent contrails in 2019. As every flight segment formed  
 390 persistent contrails and the initial contrail length is equal to the flight segment length, the  
 391  $EF_{\text{contrail}}$  per flight distance is expected to have the same magnitude as  $EF_{\text{contrail}}$  per persistent  
 392 contrail length. We use this data to define strongly warming contrail segments as those with  
 393  $EF_{\text{contrail}}$  per contrail length greater than the 95<sup>th</sup> percentile ( $> 15.4 \times 10^8 \text{ J m}^{-1}$ ), while strongly  
 394 cooling contrail segments have an  $EF_{\text{contrail}}$  per contrail length below the 5<sup>th</sup> percentile ( $< -2.39$   
 395  $\times 10^8 \text{ J m}^{-1}$ ). Fig. 9a in the main text shows that the most strongly warming contrail segments  
 396 are more prevalent over the US and North Atlantic, and Table S9 suggests that these contrail  
 397 segments are generally formed by: (i) eastbound transatlantic flights from the North/South  
 398 America to Europe and; (ii) transcontinental flights across the US, likely because these routes  
 399 generally depart during the evenings (Teoh et al., 2022). In contrast, the most strongly cooling  
 400 contrail segments are more common over Southeast Asia, Northern Asia, Europe, and the east  
 401 of the North Atlantic (Fig. 9b in the main text) and Table S10 suggests that these contrails are

402 formed by: (i) short-/medium-haul flights around Southeast and East Asia, likely because the  
403 region has a highest ratio of SDR to OLR relative to other regions; long-haul flights (ii) from  
404 the Middle East to Southeast Asia/Oceania and (iii) from Asia to Europe, likely due to flight  
405 scheduling factors where they have a higher probability of forming persistent contrails around  
406 dawn before they arrive to their destination; and (iv) westbound transatlantic air traffic activity  
407 that is generally highest during the morning (Teoh et al., 2022). Tables S9 and S10 also show  
408 that the top 20 origin-destination airport pairs accounted for: (i) 5.5% of the flights that formed  
409 strongly warming contrail segments; and (ii) 8.3% of the flights that formed strongly cooling  
410 contrail segments.

#### 411 **S4 Sensitivity analysis**

412 Table S11 summarises the sensitivity of the simulated contrail properties and climate forcing  
413 to the corrections applied to the ERA5 HRES humidity fields, assumptions in aircraft-engine  
414 assignment and emissions, and contrail model parameters. Fig. S17 presents the global monthly  
415 mean contrail net RF from the different simulation runs, and shows that the percentage change  
416 in global monthly contrail net RF exhibits seasonal effects when comparing between the  
417 baseline simulation versus the simulation: (i) without humidity correction; (ii) with a constant  
418 humidity correction, c.f. Eq. (S5) where  $RH_{i_c} = 0.95$ ; (iii) with a constant nvPM  $EI_n$  of  $10^{15} \text{ kg}^{-1}$   
419 <sup>1</sup> for all waypoints; and (iv) without radiative heating interactions with the contrail plume.

**Table S11: The 2019 global annual aviation fuel consumption, emissions, and contrail properties from the different model runs used in the sensitivity analysis.**

| 2019 sensitivity analysis                                               |                                   | Baseline  | No humidity correction | Constant humidity correction (RHic = 0.95) | Default aircraft-engine: BADA | Constant nvPM EI <sub>n</sub> (10 <sup>15</sup> kg <sup>-1</sup> ) | Constant nvPM EI <sub>n</sub> (10 <sup>14</sup> kg <sup>-1</sup> ) | No radiative heating |
|-------------------------------------------------------------------------|-----------------------------------|-----------|------------------------|--------------------------------------------|-------------------------------|--------------------------------------------------------------------|--------------------------------------------------------------------|----------------------|
| Annual fuel burn                                                        | 10 <sup>9</sup> kg                | 280.1     | 280.1                  | 280.1                                      | 279.2                         | 280.1                                                              | 280.1                                                              | 280.1                |
| Fuel burn per distance                                                  | kg km <sup>-1</sup>               | 4.596     | 4.596                  | 4.596                                      | 4.582                         | 4.596                                                              | 4.596                                                              | 4.596                |
| Annual CO <sub>2</sub> emissions                                        | 10 <sup>9</sup> kg                | 884.8     | 884.8                  | 884.8                                      | 882                           | 884.8                                                              | 884.8                                                              | 884.8                |
| Mean overall efficiency, $\eta$                                         | -                                 | 0.297     | 0.302                  | 0.297                                      | 0.297                         | 0.297                                                              | 0.297                                                              | 0.297                |
| Mean nvPM EI <sub>n</sub>                                               | 10 <sup>15</sup> kg <sup>-1</sup> | 1.02      | 1.02                   | 1.02                                       | 1.39                          | 1                                                                  | 0.1                                                                | 1.02                 |
| Mean nvPM per distance travelled                                        | 10 <sup>12</sup> m <sup>-1</sup>  | 4.69      | 4.69                   | 4.69                                       | 6.35                          | 4.6                                                                | 0.46                                                               | 4.69                 |
| Flights forming contrails                                               | %                                 | 42.53     | 42.13                  | 42.56                                      | 42.58                         | 42.53                                                              | 42.53                                                              | 42.53                |
| Flights forming persistent contrails                                    | %                                 | 23.78     | 21.88                  | 24.92                                      | 23.79                         | 23.78                                                              | 23.82                                                              | 23.88                |
| Annual contrail length                                                  | 10 <sup>9</sup> km                | 21.35     | 21.25                  | 21.45                                      | 21.37                         | 21.35                                                              | 21.35                                                              | 21.35                |
| Flight dist. forming contrails                                          | %                                 | 35        | 34.9                   | 35.2                                       | 35.1                          | 35                                                                 | 35                                                                 | 35                   |
| Annual persistent contrail length                                       | 10 <sup>9</sup> km                | 3.018     | 2.564                  | 3.452                                      | 3.017                         | 3.014                                                              | 3.039                                                              | 3.058                |
| Flight dist. forming persistent contrails                               | %                                 | 4.95      | 4.21                   | 5.66                                       | 4.95                          | 4.95                                                               | 4.99                                                               | 5.02                 |
| Initial mean ice particle number per contrail length, $n_{ice,initial}$ | 10 <sup>12</sup> m <sup>-1</sup>  | 2.5       | 2.22                   | 2.45                                       | 3.31                          | 2.25                                                               | 0.22                                                               | 2.5                  |
| Mean lifetime ice particle number per contrail length, $n_{ice}$        | 10 <sup>12</sup> m <sup>-1</sup>  | 1.88      | 1.86                   | 1.91                                       | 2.47                          | 1.72                                                               | 0.18                                                               | 1.97                 |
| Mean contrail lifetime                                                  | h                                 | 2.43      | 2.21                   | 2.44                                       | 2.56                          | 2.56                                                               | 1.66                                                               | 3                    |
| Mean ice particle volume mean radius, $r_{ice}$                         | $\mu$ m                           | 9.96      | 7.82                   | 9.12                                       | 9.19                          | 9.03                                                               | 14.1                                                               | 8.5                  |
| Mean contrail segment optical depth, $\tau_{contrail}$                  | -                                 | 0.139     | 0.094                  | 0.118                                      | 0.154                         | 0.141                                                              | 0.07                                                               | 0.111                |
| Mean contrail width                                                     | m                                 | 9903      | 8507                   | 9864                                       | 10586                         | 10521                                                              | 5713                                                               | 6875                 |
| Mean contrail depth                                                     | m                                 | 803       | 698                    | 773                                        | 819                           | 823                                                                | 719                                                                | 475                  |
| Contrail cirrus coverage                                                | %                                 | 0.06      | 0.03                   | 0.07                                       | 0.07                          | 0.08                                                               | 0.02                                                               | 0.10                 |
| Contrail cirrus coverage, clear sky                                     | %                                 | 0.66      | 0.37                   | 0.66                                       | 0.74                          | 0.86                                                               | 0.08                                                               | 0.60                 |
| Cloud-contrail overlap                                                  | %                                 | 90.2      | 91.8                   | 89.8                                       | 90.6                          | 90.7                                                               | 67.5                                                               | 83.1                 |
| Number of flights: warming contrails                                    | -                                 | 6,741,548 | 6,034,669              | 7,041,971                                  | 6,693,704                     | 6,721,659                                                          | 7,031,761                                                          | 6,922,105            |
| Number of flights: cooling contrails                                    | -                                 | 2,821,562 | 2,765,116              | 2,981,694                                  | 2,873,810                     | 2,840,726                                                          | 2,550,238                                                          | 2,681,120            |
| Ratio: warming-to-cooling contrails                                     | -                                 | 2.39      | 2.18                   | 2.36                                       | 2.33                          | 2.37                                                               | 2.76                                                               | 2.58                 |
| Mean SW RF'                                                             | W m <sup>-2</sup>                 | -4.15     | -2.95                  | -3.72                                      | -4.55                         | -4.19                                                              | -2.12                                                              | -3.49                |
| Mean LW RF'                                                             | W m <sup>-2</sup>                 | 5.36      | 3.48                   | 4.69                                       | 5.78                          | 5.51                                                               | 3.23                                                               | 4.4                  |
| Mean net RF'                                                            | W m <sup>-2</sup>                 | 1.22      | 0.533                  | 0.97                                       | 1.23                          | 1.33                                                               | 1.11                                                               | 0.908                |
| Annual mean SW RF                                                       | mW m <sup>-2</sup>                | -63.7     | -36.1                  | -67.1                                      | -74.5                         | -74.4                                                              | -13.5                                                              | -65.9                |
| Annual mean LW RF                                                       | mW m <sup>-2</sup>                | 126       | 70.9                   | 132                                        | 148                           | 149                                                                | 27.3                                                               | 133                  |
| Annual mean net RF                                                      | mW m <sup>-2</sup>                | 62.1      | 34.8                   | 64.5                                       | 73.1                          | 74.8                                                               | 13.7                                                               | 66.8                 |
| Annual EF <sub>contrail</sub>                                           | 10 <sup>18</sup> J                | 999       | 559                    | 1038                                       | 1176                          | 1204                                                               | 221                                                                | 1075                 |
| EF <sub>contrail</sub> per flight distance                              | 10 <sup>8</sup> J m <sup>-1</sup> | 0.164     | 0.092                  | 0.17                                       | 0.193                         | 0.198                                                              | 0.036                                                              | 0.176                |
| EF <sub>contrail</sub> per contrail length                              | 10 <sup>8</sup> J m <sup>-1</sup> | 3.31      | 2.18                   | 3.01                                       | 3.9                           | 3.99                                                               | 0.727                                                              | 3.51                 |
| Flights responsible for 80% EF <sub>contrail</sub>                      | %                                 | 2.68      | 2.23                   | 2.89                                       | 2.81                          | 2.66                                                               | 2.65                                                               | 2.92                 |

421 **Table S12: Comparison of the 2019 regional annual mean contrail SW, LW and net RF between the baseline simulation (with radiative heating and without contrail-**  
 422 **contrail overlapping) versus the simulation that accounts for the radiative effects of contrail-contrail overlapping, and another simulation that without the effects of**  
 423 **radiative heating interactions with the contrail plume.**

| Regional sensitivity analysis                                                                                                  | Global | USA   | Europe | East Asia | SEA   | Latin America | Africa & Middle East | China | India | North Atlantic | North Pacific | Arctic Region |
|--------------------------------------------------------------------------------------------------------------------------------|--------|-------|--------|-----------|-------|---------------|----------------------|-------|-------|----------------|---------------|---------------|
| <b>2019: Baseline simulation (Radiative heating effects ✓, contrail-contrail overlapping ✗)</b>                                |        |       |        |           |       |               |                      |       |       |                |               |               |
| Annual mean SW RF (mW m <sup>-2</sup> )                                                                                        | -63.7  | -485  | -1160  | -88.9     | -83.8 | -14.7         | -20.0                | -87.8 | -35.6 | -300           | -55.0         | -10.2         |
| Annual mean LW RF (mW m <sup>-2</sup> )                                                                                        | 126    | 900   | 2038   | 153       | 174   | 33.3          | 38.7                 | 150   | 81.2  | 601            | 103           | 29.2          |
| Annual mean Net RF (mW m <sup>-2</sup> )                                                                                       | 62.1   | 414   | 876    | 63.9      | 90.4  | 18.5          | 18.6                 | 62.3  | 45.4  | 300            | 47.7          | 19.0          |
| <b>2019 Sensitivity analysis: Contrail-contrail overlapping (Radiative heating effects ✓, contrail-contrail overlapping ✓)</b> |        |       |        |           |       |               |                      |       |       |                |               |               |
| Annual mean SW RF (mW m <sup>-2</sup> )                                                                                        | -57.8  | -435  | -953   | -84.4     | -81.4 | -14.7         | -21.3                | -85.2 | -34.5 | -281           | -52.9         | -9.94         |
| Annual mean LW RF (mW m <sup>-2</sup> )                                                                                        | 117    | 810   | 1750   | 146       | 169   | 33.2          | 41.5                 | 148   | 78.9  | 571            | 99.8          | 28.4          |
| Annual mean Net RF (mW m <sup>-2</sup> )                                                                                       | 59.1   | 374   | 794    | 61.2      | 87.4  | 18.5          | 20.2                 | 62.5  | 44.1  | 289            | 46.8          | 18.5          |
| Change in SW RF                                                                                                                | -9.3%  | -10%  | -18%   | -5.1%     | -2.9% | 0.0%          | 6.5%                 | -3.0% | -3.1% | -6.3%          | -3.8%         | -2.5%         |
| Change in LW RF                                                                                                                | -7.1%  | -10%  | -14%   | -4.6%     | -2.9% | -0.3%         | 7.2%                 | -1.3% | -2.8% | -5.0%          | -3.1%         | -2.7%         |
| Change in net RF                                                                                                               | -4.8%  | -9.7% | -9.4%  | -4.2%     | -3.3% | 0.0%          | 8.6%                 | 0.3%  | -2.9% | -3.7%          | -1.9%         | -2.6%         |
| <b>2019 Sensitivity analysis: No radiative heating (Radiative heating effects ✗, contrail-contrail overlapping ✗)</b>          |        |       |        |           |       |               |                      |       |       |                |               |               |
| Annual mean SW RF (mW m <sup>-2</sup> )                                                                                        | -65.9  | -452  | -1214  | -81.3     | -82.0 | -14.9         | -22.1                | -87.8 | -36.1 | -318           | -56.7         | -11.8         |
| Annual mean LW RF (mW m <sup>-2</sup> )                                                                                        | 133    | 874   | 2233   | 149       | 177   | 33.2          | 43.3                 | 152   | 79.1  | 624            | 106           | 31.7          |
| Annual mean Net RF (mW m <sup>-2</sup> )                                                                                       | 66.8   | 420   | 1016   | 67.4      | 95.0  | 18.2          | 21.2                 | 64.4  | 42.8  | 305            | 49.2          | 20.0          |
| Change in SW RF                                                                                                                | 3.5%   | -6.8% | 4.7%   | -8.5%     | -2.1% | 1.4%          | 11%                  | 0.0%  | 1.4%  | 6.0%           | 3.1%          | 16%           |
| Change in LW RF                                                                                                                | 5.6%   | -2.9% | 9.6%   | -2.6%     | 1.7%  | -0.3%         | 12%                  | 1.3%  | -2.6% | 3.8%           | 2.9%          | 8.6%          |
| Change in net RF                                                                                                               | 7.6%   | 1.4%  | 16%    | 5.5%      | 5.1%  | -1.6%         | 14%                  | 3.4%  | -5.7% | 1.7%           | 3.1%          | 5.3%          |

424

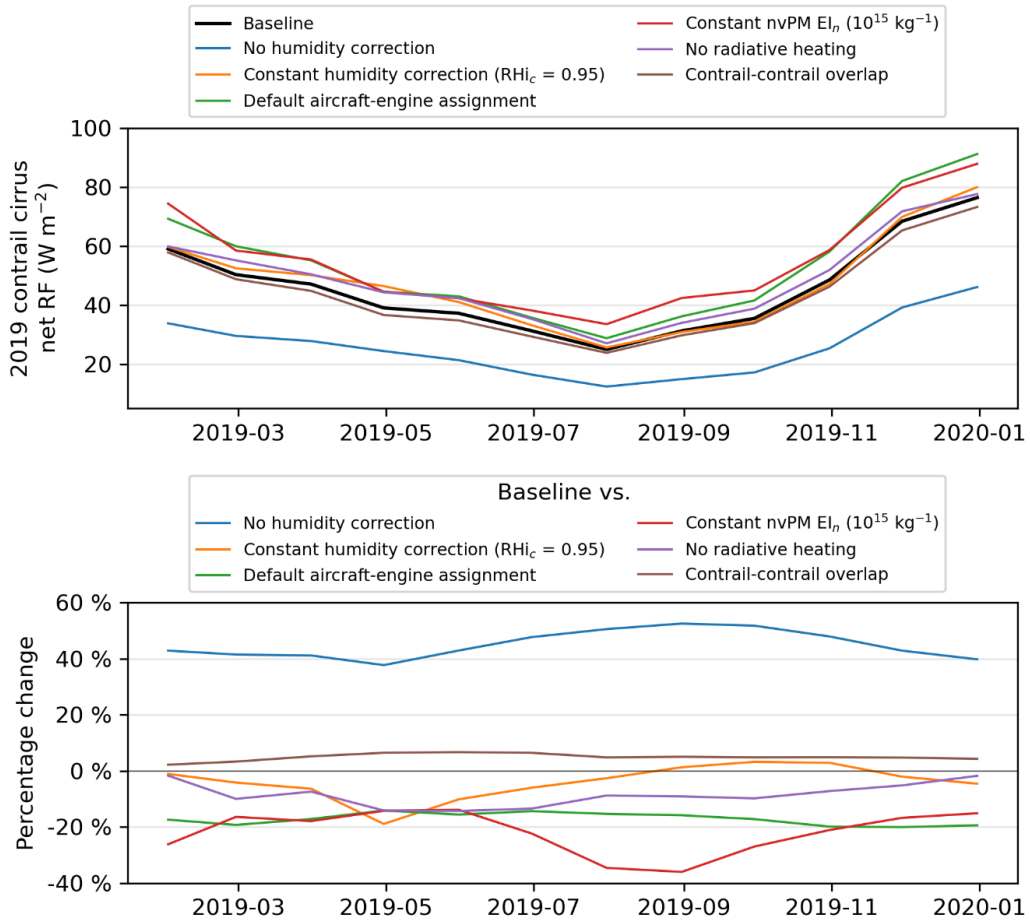

425

426 **Figure S17: Comparison of the global monthly mean contrail net RF between the baseline scenario versus**  
 427 **the simulation without humidity correction (blue lines), the simulation with default aircraft-engine**  
 428 **assignments from BADA (orange lines), and the simulation without radiative heating effects (green lines).**

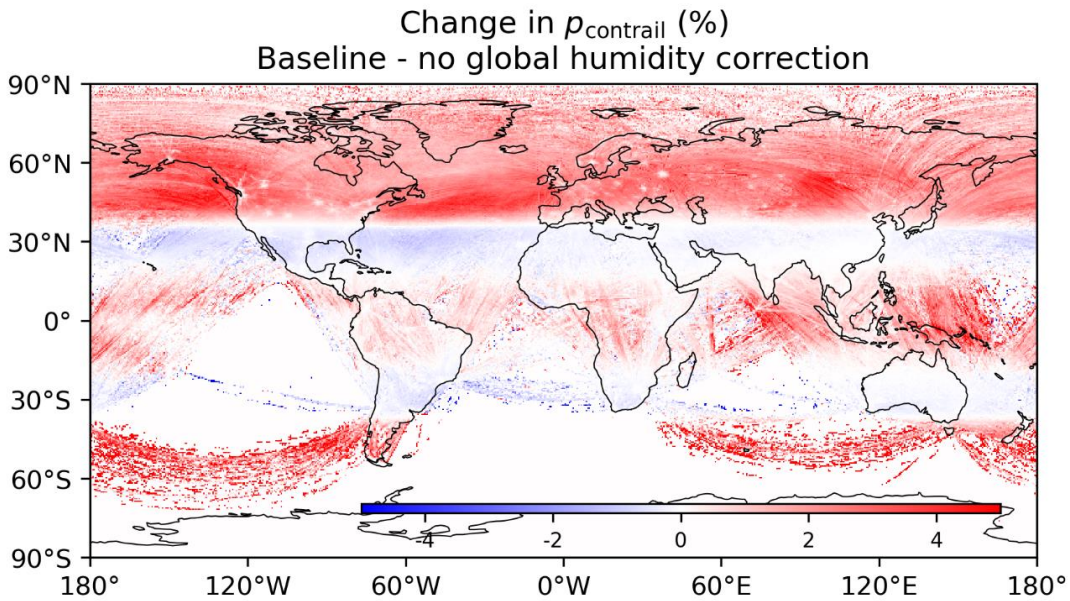

429

430 **Figure S18: Change in the percentage of flight distance forming persistent contrails ( $p_{\text{contrail}}$ ) for 2019 when**  
 431 **comparing the baseline scenario with the simulation without global humidity corrections applied to the**  
 432 **ERA5 HRES. Basemap plotted using Cartopy 0.22.0 and sourced from Natural Earth; licensed under**  
 433 **public domain.**

#### 434 **S4.1 Extended humidity correction**

435 Fig. 10a in the main text shows significant latitude variations in the global annual mean contrail  
436 net RF when comparing between the baseline simulation with the extended global humidity  
437 corrections, c.f. Eq. (S6) to (S9) and described in Section S1.3, and the simulation without  
438 humidity corrections applied to the ERA5 HRES.

439 Over the tropics ( $25^{\circ}\text{S}$  to  $25^{\circ}\text{N}$ ), the extended humidity correction reduces the ISSR coverage  
440 ( $a_{\text{opt}} > 1$ , c.f. Eq. (S6) and Fig. S3a) but increases the RHi inside ISSRs ( $b_{\text{opt}} \approx 3$ , c.f. Eq. (S6)  
441 and Fig. S3b). When taken together, the extended humidity correction increases  $p_{\text{contrail}}$  (from  
442 2.4% without humidity correction to 2.6%, shown in Fig. S18) because a higher proportion of  
443 contrail segments survive the wake vortex phase, lifetime (+3.2%, from 2.50 to 2.58 h), and  
444 contrail net RF (+59%, from 32.9 to 52.3  $\text{mW m}^{-2}$ ). In the subtropics ( $30^{\circ}\text{N/S} \pm 5^{\circ}$ ), changes  
445 in  $p_{\text{contrail}}$  (from 2.5% without humidity correction to 2.3%) and contrail net RF (+2.2%, from  
446 82.4 to 84.2  $\text{mW m}^{-2}$ ) are small because effects from the smaller ISSR coverage ( $a_{\text{opt}} > 1$ ) is  
447 balanced out by the smaller relative increase in RHi inside ISSRs ( $b_{\text{opt}} \approx 1.5$ ). At latitudes above  
448  $35^{\circ}\text{N}$ , the humidity correction increases the ISSR coverage ( $a_{\text{opt}} < 1$ ) and RHi ( $b_{\text{opt}} \approx 1.5$ ), both  
449 of which leads to significant increases in  $p_{\text{contrail}}$  (from 5.7% to 7.1%) and contrail net RF  
450 (+96%, from 38.9 to 76.4  $\text{mW m}^{-2}$ ). A comparison of the  $p_{\text{contrail}}$  by latitude for the simulation  
451 with and without humidity correction (Fig. S19) confirms that the minimum  $p_{\text{contrail}}$  observed  
452 at the subtropics ( $30^{\circ}\text{N/S} \pm 5^{\circ}$ ) is not an artefact of the global humidity correction.

453 Seasonally, the difference in monthly contrail net RF is largest during the summer (+50%  
454 relative to the simulation without humidity correction) and smallest in wintertime (+40%) (Fig.  
455 S17), and this is likely caused by seasonal variations in the tropopause height thereby changing  
456 the proportion of flights cruising in the drier stratosphere that is not influenced by the humidity  
457 correction. We also evaluate the consistency in identifying the top 5% of flights with strongly



458 warming contrails, where ~78% of flights with  $EF_{\text{contrail}} > 95^{\text{th}}$  percentile in the baseline  
 459 simulation is also predicted to have an  $EF_{\text{contrail}} > 95^{\text{th}}$  percentile in the simulation without  
 460 humidity correction.

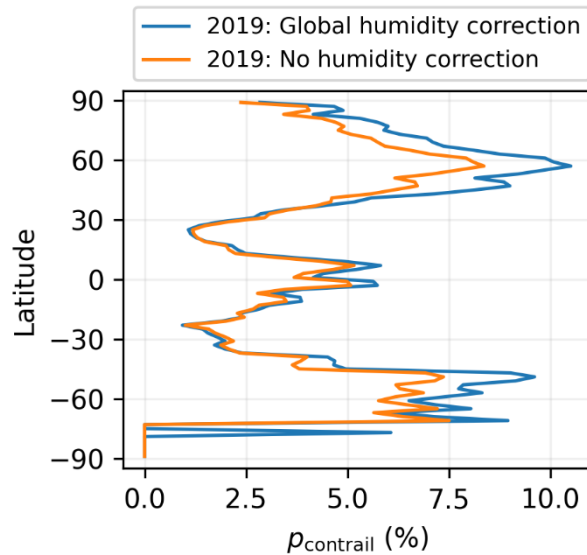

461  
 462 **Figure S19: The percentage of annual flight distance flown that formed persistent contrails ( $p_{\text{contrail}}$ ) in**  
 463 **2019 in the simulation with (blue line) and without (orange line) global humidity corrections applied to the**  
 464 **ERA5 HRES (blue line).**

#### 465 S4.2 Radiative heating effects

466 Fig. 10e compare the difference in annual mean contrail cirrus net RF between the simulations  
 467 with and without radiative heating effects and shows a: (i) larger contrail net RF along  
 468 established flight corridors, because radiative heating increases the vertical mixing rate and  
 469  $\tau_{\text{contrail}}$ ; and (ii) lower contrail net RF in regions that have a higher fraction of aged contrails,  
 470 i.e., east coast of North and South America and away from established flight corridors (Fig.  
 471 S20), because the solar and terrestrial radiation heats up the contrail plume and shortens its  
 472 lifetime. Radiative heating also reduces the annual mean contrail net RF by 14% in Europe  
 473 (Fig. 10e and Table S12) because less contrails are advected into the region via the North  
 474 Atlantic jet stream.

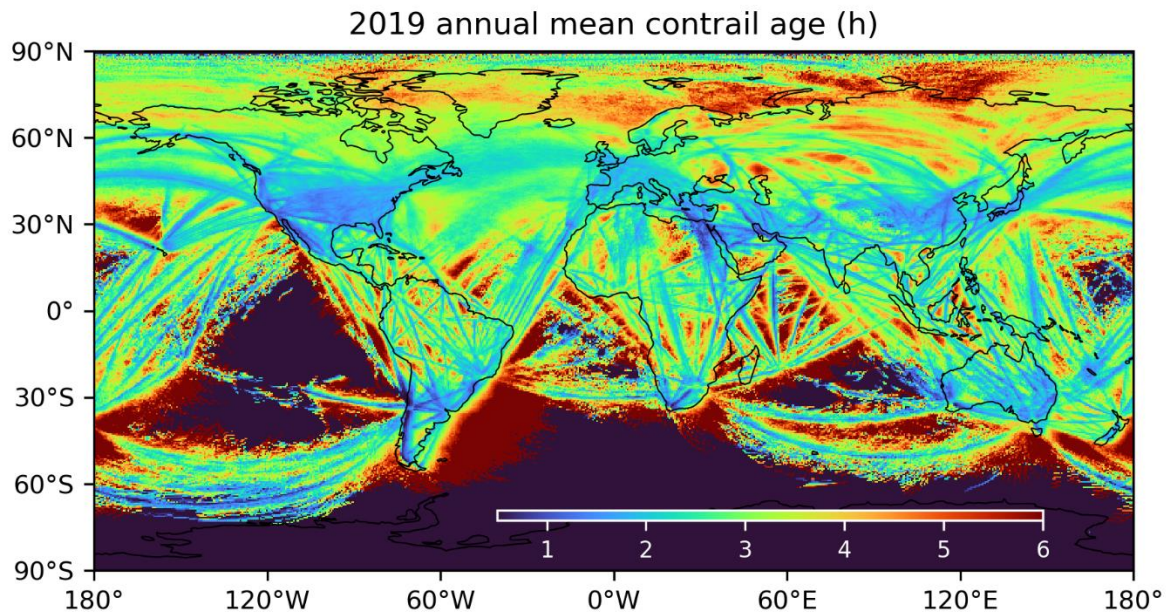

475

476 **Figure S20: The 2019 global annual mean contrail age for the simulation without radiative heating**  
 477 **interactions with the contrail plume. Basemap plotted using Cartopy 0.22.0 and sourced from Natural**  
 478 **Earth; licensed under public domain.**

479 **S4.3 Contrail-contrail overlapping**

480 Earlier studies suggested that the effects of contrail-contrail overlapping could lead to a 3%  
 481 reduction in the annual mean contrail cirrus net RF globally (Sanz-Morère et al., 2021), and  
 482 the contrail net RF could be reduced by up to 65% in regions with high air traffic density such  
 483 as Europe (Schumann et al., 2021). CoCiP, when set up in its original form, does not account  
 484 for the effects of contrail-contrail overlapping (Schumann, 2012; Schumann et al., 2012) but a  
 485 recent regional study has attempted to approximate these effects with CoCiP by changing the  
 486 background RSR and OLR fields resulting from the presence of contrails (Schumann et al.,  
 487 2021).

488 In this study, we approximate the change in global and regional annual mean contrail net RF  
 489 in 2019 due to contrail-contrail overlapping using an updated methodology of Schumann et al.  
 490 (2021) and post-processing the contrail waypoint outputs from the 2019 baseline simulation.  
 491 The contrail waypoint outputs provide information on each surviving contrail waypoint at a  
 492 specific point in time, including the unique flight and waypoint identifier, the mid-point

493 (longitude, latitude, and altitude), dimensions (length, width, and depth) and properties (ice  
494 crystal number, size, and optical depth) of contrail plume, and the local meteorology and  
495 radiation. Fundamentally, contrail-contrail overlapping changes the amount of solar and  
496 terrestrial radiation that reaches the contrail, where: (i) contrails at higher altitudes reflect part  
497 of the incoming SDR back to space, which reduces the amount of solar irradiance in reaching  
498 the contrails formed at lower altitudes; (ii) contrails at lower altitudes absorbs part of the OLR,  
499 causing contrails at higher altitudes to receive a smaller fraction of the OLR; and (iii) the SW  
500 component of the contrail RF at all altitudes increase the background RSR and cirrus albedo.  
501 On this basis, the radiative effects of contrail-contrail overlapping can be approximated by  
502 changing the background RSR and OLR fields, and the overlying cirrus optical depth above  
503 the contrail ( $\tau_{\text{cirrus}}$ ) so that these quantities, which are used as inputs to the parametric contrail  
504 RF model (Schumann et al., 2012), account for the presence of other contrails in a grid cell.

505 As CoCiP was run with model time steps ( $dt$ ) of 300 s, there are 105,120 unique time slices in  
506 2019. For each time slice, we: (i) obtain the global RSR and OLR fields at that specific time  
507 by interpolating the ERA5 HRES radiation fields; (ii) group contrail waypoints into altitude  
508 intervals of 500 m (~1640 feet); and (iii) process the contrail layers starting from the bottom to  
509 the top. All contrail segments found within each altitude interval,  $k$  (~500 m), are treated as  
510 one contrail layer where they do not overlap, and contrails above the layer under consideration  
511 (between  $k + 1$  and the highest contrail layer  $K$ ) are aggregated to update the  $\tau_{\text{cirrus}}$ ,

$$(\tau_{\text{cirrus}})_{i,j} = (\tau_{\text{cirrus,ERA5 HRES}})_{i,j} + \frac{\sum_{k+1}^K (\tau_{\text{contrail} \times L \times W})_{i,j}}{A_{i,j}}, \quad (\text{S10})$$

512 where  $i$  and  $j$  represents the longitude and latitude of each grid cell,  $\tau_{\text{contrail}}$  is the contrail  
513 segment optical depth,  $L$  and  $W$  are the contrail segment length and width, and  $A$  is the surface

514 area of each grid cell. Collectively, each contrail layer also changes the background RSR and  
 515 OLR fields,

$$\Delta\text{RSR}_{i,j} = \frac{\Sigma(-\text{RF}'_{\text{SW,overlap} \times L \times W})_{i,j}}{A_{i,j}}, \text{ and} \quad (\text{S11})$$

$$\Delta\text{OLR}_{i,j} = \frac{\Sigma(\text{RF}'_{\text{LW,overlap} \times L \times W})_{i,j}}{A_{i,j}}, \quad (\text{S12})$$

516 where the SW and LW RF' are computed with the updated RSR, OLR and  $\tau_{\text{cirrus}}$  which  
 517 accounts for the presence of other contrail cirrus, and the numerators are the sum of the contrail  
 518 SW and LW radiative flux at each grid cell. Eq. (S10) to Eq. (S12) imply that: (i) the RSR and  
 519 OLR received by contrails in the lowest layer ( $k = 1$ ) is unchanged from the baseline simulation  
 520 without contrail-contrail overlapping, but are expected to have a  $\tau_{\text{cirrus}}$  that is larger than the  
 521 baseline due to the presence of contrails above them; while (ii) contrails in the highest layer ( $k$   
 522  $= K$ ) are expected to have the same  $\tau_{\text{cirrus}}$  as the baseline simulation, and a larger RSR (and  
 523 albedo) and smaller OLR relative to the baseline simulation because of the presence of contrail  
 524 cirrus below it. The updated RSR, OLR and  $\tau_{\text{cirrus}}$  at each contrail waypoint are estimated  
 525 using a bilinear interpolation across space (longitude and latitude). These are then used as  
 526 inputs to the parametric contrail RF model (Schumann et al., 2012) to re-calculate the contrail  
 527 SW and LW RF', which are subsequently used to estimate the  $\text{EF}_{\text{contrail}}$  (Eq. (6) in the main  
 528 text) and the global and regional annual mean contrail net RF (Eq. (7) in the main text) that  
 529 accounts for contrail-contrail overlapping.

530 Using this approach, we estimate that the effects of contrail-contrail overlapping leads to a 5%  
 531 reduction in the global annual mean contrail cirrus net RF (from 62.1  $\text{mW m}^{-2}$  in the baseline  
 532 simulation to 59.1  $\text{mW m}^{-2}$ ). Our estimated change in the 2019 global annual mean contrail net  
 533 RF (-5%) is consistent with a parametric study that estimated a 3% reduction in the global

534 contrail net RF due to contrail-contrail overlapping (Sanz-Morère et al., 2021). However, there  
 535 are significant regional variations, where the reduction in annual mean contrail net RF is largest  
 536 in regions with high air traffic activity, i.e., over the US (-9.7%) and Europe (-9.4%) (Fig. 10f  
 537 in the main text and Table S12). The main factors contributing to the change in annual mean  
 538 contrail net RF is evaluated in Fig. S21, suggesting that contrail-contrail overlapping tends to:  
 539 (i) reduce the contrail climate forcing in grid cells with a large annual mean contrail net RF ( $>$   
 540  $1 \text{ W m}^{-2}$ ) and low ratio of annual mean contrail SW-to-LW RF ( $< 0.6$ ); and (ii) increases the  
 541 contrail climate forcing in grid cells with a low annual mean OLR ( $< 220 \text{ W m}^{-2}$ ) and high ratio  
 542 of annual mean contrail SW-to-LW RF ( $> 0.6$ ).

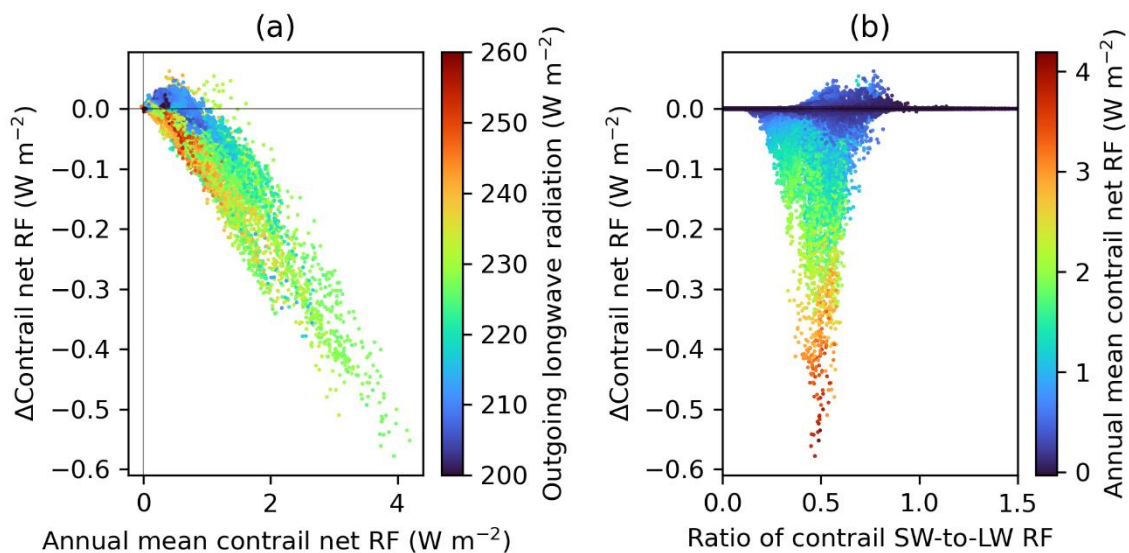

543  
 544 **Figure S21: The change in contrail climate forcing at each grid cell (y-axis) due to contrail-contrail**  
 545 **overlapping versus the: (a) annual mean contrail net RF (x-axis) and the annual mean outgoing longwave**  
 546 **radiation (colour bar); and (b) ratio of annual mean contrail SW-to-LW RF (x-axis) and the annual mean**  
 547 **contrail net RF (colour bar).**

548 We note that this approach to approximate the radiative effects of contrail-contrail overlapping  
 549 contains limitations and simplifying assumptions, where: (i) the change in background  $\tau_{\text{cirrus}}$ ,  
 550 RSR, and OLR that is caused by each contrail, c.f. Eq. (S10) to (S12), is attributed to mid-point  
 551 of the 3D contrail plume; (ii) it assumes maximum contrail-contrail overlapping across a  
 552 vertical column in the 3D grid; and (iii) it does not account for the solar zenith angle, which

553 can change the degree of overlapping, which in turn, changes the amount of solar radiation  
554 passing through each contrail layer. Thus, a more detailed evaluation of contrail-contrail  
555 overlapping that addresses these limitations is identified an avenue for future research.

## 556 **S5 Comparison with other studies**

557 Previous studies have used the 2002 AERO2K (Eyers et al., 2005) and 2006 Aviation  
558 Environmental Design Tool (AEDT) global aviation emissions inventories (Wilkerson et al.,  
559 2010) to simulate the global contrail climate forcing (Burkhardt and Kärcher, 2011; Chen and  
560 Gettelman, 2013; Schumann et al., 2015; Bock and Burkhardt, 2016; Bier and Burkhardt,  
561 2022). A recent study from Lee et al. (2021) subsequently compiled the results from four  
562 studies (Burkhardt and Kärcher, 2011; Chen and Gettelman, 2013; Schumann et al., 2015; Bock  
563 and Burkhardt, 2016) and extrapolated the 2006 global contrail net RF to 2018 levels based on  
564 the growth in global annual flight distance flown. Table S13 summarises the methodological  
565 details and results from the different studies that quantified the global annual mean contrail  
566 cirrus net RF.

567 In the main text, we compared our 2019 global annual mean contrail net RF ( $62.1 \text{ mW m}^{-2}$ )  
568 and ERF ( $26.1 \text{ mW m}^{-2}$ ) with the most recent studies from: (i) Lee et al. (2021), which  
569 estimated a 2018 global contrail net RF of  $111 [33, 189] \text{ mW m}^{-2}$  at a 95% confidence interval;  
570 (ii) Gettelman et al. (2021) which estimated a 2020 global contrail net ERF of  $62 \pm 59 \text{ mW m}^{-2}$ ,  
571 assuming an absence of the COVID-19 disruptions; and (iii) Bier & Burkhardt (2022), where  
572 the 2006 global contrail net RF from their previous study was revised down from  $56 \text{ mW m}^{-2}$   
573 (Bock and Burkhardt, 2016) to  $43.7 \text{ mW m}^{-2}$  after accounting for differences in the nvPM  
574 activation rate and ice crystal losses in the wake vortex phase. The comparison with Bier &  
575 Burkhardt (2022) suggest that the average annual growth rate of the global contrail cirrus net  
576 RF, from  $43.7 \text{ mW m}^{-2}$  in 2006 (Bier and Burkhardt, 2022) to  $62.1 \text{ mW m}^{-2}$  (this study)

577 amounting to +2.7% per annum between 2006 and 2019, was smaller than the growth in global  
578 annual flight distance flown during the same period (+3.6% per annum). The 3.6% average  
579 annual growth in flight distance flown was calculated based on the comparison of the 2006  
580 values from the AEDT aviation emissions inventory ( $38.68 \times 10^9$  km) (Wilkerson et al., 2010)  
581 with the 2019 values ( $60.94 \times 10^9$  km) provided by the Global Aviation emissions Inventory  
582 based on ADS-B (GAIA) (Teoh et al., 2024).

583 **Table S13: Summary of existing studies that quantified the global annual contrail cirrus net RF or ERF.**

| Study                      | Model       | Air traffic data                        | Global annual mean contrail net RF or ERF ( $\text{mW m}^{-2}$ )                                  | Remarks                                                                                                                                                                                                                                                                                                                                                                                                                                                |
|----------------------------|-------------|-----------------------------------------|---------------------------------------------------------------------------------------------------|--------------------------------------------------------------------------------------------------------------------------------------------------------------------------------------------------------------------------------------------------------------------------------------------------------------------------------------------------------------------------------------------------------------------------------------------------------|
| Burkhardt & Kärcher (2011) | ECHAM4      | 2002                                    | 37.5 (RF)                                                                                         | <ul style="list-style-type: none"> <li>Contrails initialised with dimensions of 100m (width) <math>\times</math> 175 m (depth), and ice water content of <math>0.4 \text{ mg m}^{-3}</math>.</li> </ul>                                                                                                                                                                                                                                                |
| Chen & Gettelman (2013)    | CAM5        | 2006                                    | 57 (RF)                                                                                           | <ul style="list-style-type: none"> <li>Contrails initialised with a <math>300 \times 300\text{m}</math> cross-sectional area, <math>7 \mu\text{m}</math> ice particle diameter and spherical ice particle habits.</li> <li>Results revised in Lee et al. (2021)</li> </ul>                                                                                                                                                                             |
| Schumann et al. (2015)     | CoCiP-CAM3  | 2006                                    | 63 (RF)                                                                                           | <ul style="list-style-type: none"> <li><math>\text{RHi}_{\text{corrected}} = \text{RHi} / 0.90</math></li> <li>Accounts for humidity exchange between contrails and the background air.</li> </ul>                                                                                                                                                                                                                                                     |
| Bock & Burkhardt (2016)    | ECHAM5      | 2006                                    | 56 (RF)                                                                                           | <ul style="list-style-type: none"> <li>Incorporated improved parameterisation of the contrail microphysical and optical properties from Lohmann et al. (2008),</li> <li>Contrails initialised with constant ice crystal concentration of <math>150 \text{ cm}^{-3}</math>.</li> </ul>                                                                                                                                                                  |
| Lee et al. (2021)          | Multi-model | 2018                                    | <ul style="list-style-type: none"> <li>111 [33, 189] (RF)</li> <li>57.4 [17, 98] (ERF)</li> </ul> | <ul style="list-style-type: none"> <li>Compiled the 2006 global annual mean contrail net RF from the above four studies and extrapolated to 2018 levels based on the growth in global air traffic.</li> <li>RF range captures the uncertainty in: (i) contrail cirrus radiative response; and (ii) upper tropospheric water budget and the contrail cirrus scheme.</li> </ul>                                                                          |
| Gettelman et al. (2021)    | CAM6        | 2020<br>(Assuming no COVID disruptions) | $62 \pm 59$ (ERF)                                                                                 | <ul style="list-style-type: none"> <li>Scaled air traffic data from 2006 to 2020 levels assuming that: (i) the global air traffic distribution remains unchanged; and (ii) an absence of any COVID-19 disruptions.</li> <li>Contrails initialised with a 100 m diameter, <math>7.5 \mu\text{m}</math> ice particle diameter and spherical ice particle habits.</li> <li>Accounts for the second-order contrail effects on background clouds</li> </ul> |
| Bier & Burkhardt (2022)    | ECHAM5      | 2006                                    | 44 [31, 49] (RF)                                                                                  | <ul style="list-style-type: none"> <li>Accounts for difference in nvPM activation rate and ice crystal losses in the wake vortex phase,</li> <li>RF range captures the differences in initial soot assumptions of <math>1.5 [0.5, 3.0] \times 10^{15} \text{ kg}^{-1}</math>.</li> </ul>                                                                                                                                                               |

584 The AEDT aviation emissions inventory also reported the 2006 annual fuel consumption to be  
585  $188.2 \times 10^9$  kg (Wilkerson et al., 2010), which we then use to derive the fuel consumption per  
586 flight distance flown ( $4.87 \text{ kg km}^{-1}$ ) and compare it with our estimates ( $4.60 \text{ kg km}^{-1}$ ). The  
587 nvPM EI<sub>n</sub> was not reported in the AEDT, and we approximated the fleet-aggregated nvPM EI<sub>n</sub>  
588 for 2006 ( $\sim 1.15 \times 10^{15} \text{ kg}^{-1}$ ) with GAIA by removing flights that are flown using new  
589 commercial aircraft types introduced after 2006 (i.e., Airbus A320neo, A350, A380 and the  
590 Boeing 737-MAX, 747-800 and 787 families). The absolute reduction in mean fuel  
591 consumption per flight distance flown (-6%) and nvPM EI<sub>n</sub> (-11%) are expected to lower the  
592 number of nvPM emitted per flight distance flown, c.f. Eq. (5) in the main text, which  
593 subsequently reduces the EF<sub>contrail</sub> per flight distance flown (Teoh et al., 2022).

## 594 **References**

- 595 Agarwal, A., Meijer, V. R., Eastham, S. D., Speth, R. L., and Barrett, S. R. H.: Reanalysis-driven  
596 simulations may overestimate persistent contrail formation by 100-250%, *Environmental Research*  
597 *Letters*, 17, 1–14, <https://doi.org/10.1088/1748-9326/AC38D9>, 2022.
- 598 Bier, A. and Burkhardt, U.: Impact of Parametrizing Microphysical Processes in the Jet and Vortex  
599 Phase on Contrail Cirrus Properties and Radiative Forcing, *Journal of Geophysical Research:*  
600 *Atmospheres*, 127, e2022JD036677, <https://doi.org/10.1029/2022JD036677>, 2022.
- 601 Bock, L. and Burkhardt, U.: Reassessing properties and radiative forcing of contrail cirrus using a  
602 climate model, *Journal of Geophysical Research: Atmospheres*, 121, 9717–9736,  
603 <https://doi.org/10.1002/2016JD025112>, 2016.
- 604 Boulanger, D., Bundke, U., Gallagher, M., Gerbig, C., Hermann, M., Nédélec, P., Rohs, S., Sauvage,  
605 B., Ziereis, H., Thouret, V., and Petzold, A.: IAGOS Time series [Data set], AERIS,  
606 <https://doi.org/https://doi.org/10.25326/06>, 2022.
- 607 Burkhardt, U. and Kärcher, B.: Global radiative forcing from contrail cirrus, *Nat Clim Chang*, 1, 54–  
608 58, <https://doi.org/10.1038/nclimate1068>, 2011.
- 609 Chen, C. C. and Gettelman, A.: Simulated radiative forcing from contrails and contrail cirrus, *Atmos*  
610 *Chem Phys*, 13, 12525–12536, <https://doi.org/10.5194/acp-13-12525-2013>, 2013.
- 611 ECMWF: The Copernicus Programme: Climate Data Store, <https://cds.climate.copernicus.eu/#!/home>,  
612 2021. Last access: 15 February 2022.
- 613 Eyers, C. J., Addleton, D., Atkinson, K., Broomhead, M. J., Christou, R., Elliff, T., Falk, R., Gee, I.,  
614 Lee, D. S., Marizy, C., Michot, S., Middel, J., Newton, P., Norman, P., Plohr, M., Raper, D., and  
615 Stanciou, N.: AERO2K global aviation emissions inventories for 2002 and 2025, QinetiQ for European  
616 Commission under Contract No. G4RD-CT-2000-00382, Farnborough, Hampshire, GU14 0LX, pp.,  
617 2005., 2005.



618 Gettelman, A., Chen, C. C., and Bardeen, C. G.: The climate impact of COVID-19-induced contrail  
619 changes, *Atmos Chem Phys*, 21, 9405–9416, <https://doi.org/10.5194/ACP-21-9405-2021>, 2021.

620 Gierens, K., Matthes, S., and Rohs, S.: How Well Can Persistent Contrails Be Predicted?, *Aerospace*,  
621 7, 169, <https://doi.org/10.3390/AEROSPACE7120169>, 2020.

622 Hersbach, H., Bell, B., Berrisford, P., Hirahara, S., Horányi, A., Muñoz-Sabater, J., Nicolas, J., Peubey,  
623 C., Radu, R., Schepers, D., Simmons, A., Soci, C., Abdalla, S., Abellan, X., Balsamo, G., Bechtold, P.,  
624 Biavati, G., Bidlot, J., Bonavita, M., De Chiara, G., Dahlgren, P., Dee, D., Diamantakis, M., Dragani,  
625 R., Flemming, J., Forbes, R., Fuentes, M., Geer, A., Haimberger, L., Healy, S., Hogan, R. J., Hólm, E.,  
626 Janisková, M., Keeley, S., Laloyaux, P., Lopez, P., Lupu, C., Radnoti, G., de Rosnay, P., Rozum, I.,  
627 Vamborg, F., Villaume, S., and Thépaut, J. N.: The ERA5 global reanalysis, *Quarterly Journal of the*  
628 *Royal Meteorological Society*, 146, 1999–2049, <https://doi.org/10.1002/qj.3803>, 2020.

629 Hoare, G.: Country bounding boxes, <https://gist.github.com/graydon/11198540>, 2014. Last access: 22  
630 December 2022.

631 ICAO: The World of Air Transport in 2020, [https://www.icao.int/annual-report-2020/Pages/the-world-  
632 of-air-transport-in-2020.aspx](https://www.icao.int/annual-report-2020/Pages/the-world-of-air-transport-in-2020.aspx), 2021. Last access: 15 August 2022

633 Kärcher, B. and Lohmann, U.: A parameterization of cirrus cloud formation: Homogeneous freezing of  
634 supercooled aerosols, *Journal of Geophysical Research: Atmospheres*, 107, AAC 4-1,  
635 <https://doi.org/10.1029/2001JD000470>, 2002.

636 Koop, T., Luo, B., Tsias, A., and Peter, T.: Water activity as the determinant for homogeneous ice  
637 nucleation in aqueous solutions, *Nature*, 406, 611–614, <https://doi.org/10.1038/35020537>, 2000.

638 Lee, D. S., Fahey, D. W., Skowron, A., Allen, M. R., Burkhardt, U., Chen, Q., Doherty, S. J., Freeman,  
639 S., Forster, P. M., Fuglestedt, J., Gettelman, A., De León, R. R., Lim, L. L., Lund, M. T., Millar, R. J.,  
640 Owen, B., Penner, J. E., Pitari, G., Prather, M. J., Sausen, R., and Wilcox, L. J.: The contribution of  
641 global aviation to anthropogenic climate forcing for 2000 to 2018, *Atmos Environ*, 244, 117834,  
642 <https://doi.org/10.1016/J.ATMOSENV.2020.117834>, 2021.

643 Lohmann, U., Spichtinger, P., Jess, S., Peter, T., and Smit, H.: Cirrus cloud formation and ice  
644 supersaturated regions in a global climate model, *Environmental Research Letters*, 3, 045022,  
645 <https://doi.org/10.1088/1748-9326/3/4/045022>, 2008.

646 Parr, W. C. and Schucany, W. R.: Minimum distance and robust estimation, *J Am Stat Assoc*, 75, 616–  
647 624, <https://doi.org/10.1080/01621459.1980.10477522>, 1980.

648 Petzold, A., Neis, P., Rütimann, M., Rohs, S., Berkes, F., G. J. Smit, H., Krämer, M., Spelten, N.,  
649 Spichtinger, P., Nédélec, P., and Wahner, A.: Ice-supersaturated air masses in the northern mid-latitudes  
650 from regular in situ observations by passenger aircraft: Vertical distribution, seasonality and  
651 tropospheric fingerprint, *Atmos Chem Phys*, 20, 8157–8179, [https://doi.org/10.5194/ACP-20-8157-  
652 2020](https://doi.org/10.5194/ACP-20-8157-2020), 2020.

653 Pruppacher, H. R., Klett, J. D., and Wang, P. K.: *Microphysics of Clouds and Precipitation*,  
654 <http://dx.doi.org/10.1080/02786829808965531>, 28, 381–382,  
655 <https://doi.org/10.1080/02786829808965531>, 2007.

656 Reutter, P., Neis, P., Rohs, S., and Sauvage, B.: Ice supersaturated regions: Properties and validation of  
657 ERA-Interim reanalysis with IAGOS in situ water vapour measurements, *Atmos Chem Phys*, 20, 787–  
658 804, <https://doi.org/10.5194/ACP-20-787-2020>, 2020.

659 Santer, B. D., Sausen, R., Wigley, T. M. L., Boyle, J. S., AchutaRao, K., Doutriaux, C., Hansen, J. E.,  
660 Meehl, G. A., Roeckner, E., Ruedy, R., Schmidt, G., and Taylor, K. E.: Behavior of tropopause height

661 and atmospheric temperature in models, reanalyses, and observations: Decadal changes, *Journal of*  
662 *Geophysical Research: Atmospheres*, 108, ACL 1-1, <https://doi.org/10.1029/2002JD002258>, 2003.

663 Sanz-Morère, I., Eastham, S. D., Allroggen, F., Speth, R. L., and Barrett, S. R. H.: Impacts of multi-  
664 layer overlap on contrail radiative forcing, *Atmos Chem Phys*, 21, 1649–1681,  
665 <https://doi.org/10.5194/ACP-21-1649-2021>, 2021.

666 Schumann, U.: A contrail cirrus prediction model, *Geosci Model Dev*, 5, 543–580,  
667 <https://doi.org/10.5194/gmd-5-543-2012>, 2012.

668 Schumann, U., Mayer, B., Graf, K., and Mannstein, H.: A parametric radiative forcing model for  
669 contrail cirrus, *J Appl Meteorol Climatol*, 51, 1391–1406, <https://doi.org/10.1175/JAMC-D-11-0242.1>,  
670 2012.

671 Schumann, U., Penner, J. E., Chen, Y., Zhou, C., and Graf, K.: Dehydration effects from contrails in a  
672 coupled contrail–climate model, *Atmos Chem Phys*, 15, 11179–11199, <https://doi.org/10.5194/acp-15-11179-2015>, 2015.

674 Schumann, U., Poll, I., Teoh, R., Koelle, R., Spinielli, E., Molloy, J., Koudis, G. S., Baumann, R.,  
675 Bugliaro, L., Stettler, M., and Voigt, C.: Air traffic and contrail changes over Europe during COVID-  
676 19: A model study, *Atmos Chem Phys*, 21, 7429–7450, <https://doi.org/10.5194/ACP-21-7429-2021>,  
677 2021.

678 Sobieralski, J. B. and Mumbower, S.: Jet-setting during COVID-19: Environmental implications of the  
679 pandemic induced private aviation boom, *Transp Res Interdiscip Perspect*, 13, 100575,  
680 <https://doi.org/10.1016/J.TRIP.2022.100575>, 2022.

681 Sonntag, D.: Advancements in the field of hygrometry, *Meteorologische Zeitschrift*, 3, 51–66,  
682 <https://doi.org/10.1127/metz/3/1994/51>, 1994.

683 Teoh, R., Schumann, U., Majumdar, A., and Stettler, M. E. J.: Mitigating the Climate Forcing of Aircraft  
684 Contrails by Small-Scale Diversions and Technology Adoption, *Environ Sci Technol*, 54, 2941–2950,  
685 <https://doi.org/10.1021/acs.est.9b05608>, 2020.

686 Teoh, R., Schumann, U., Gryspeerdt, E., Shapiro, M., Molloy, J., Koudis, G., Voigt, C., and Stettler,  
687 M.: Aviation Contrail Climate Effects in the North Atlantic from 2016–2021., *Atmos. Chem. Phys.*, 22,  
688 10919–10935, <https://doi.org/https://doi.org/10.5194/acp-2022-169>, 2022.

689 Teoh, R., Engberg, Z., Shapiro, M., Dray, L., and Stettler, M. E. J.: The high-resolution Global Aviation  
690 emissions Inventory based on ADS-B (GAIA) for 2019–2021, *Atmos Chem Phys*, 24, 725–744,  
691 <https://doi.org/10.5194/ACP-24-725-2024>, 2024.

692 Tompkins, A. M., Gierens, K., and Rädcl, G.: Ice supersaturation in the ECMWF integrated forecast  
693 system, *Quarterly Journal of the Royal Meteorological Society*, 133, 53–63,  
694 <https://doi.org/10.1002/qj.14>, 2007.

695 Wilkerson, J. T., Jacobson, M. Z., Malwitz, A., Balasubramanian, S., Wayson, R., Fleming, G., Naiman,  
696 A. D., and Lele, S. K.: Analysis of emission data from global commercial aviation: 2004 and 2006,  
697 *Atmos Chem Phys*, 10, 6391–6408, <https://doi.org/10.5194/acp-10-6391-2010>, 2010.

698
